# Supplementary material for: Large-scale genomic sequencing of extraintestinal pathogenic Escherichia coli strains
Source: HighWire-hosted journal article supplement (doi:10.1101/gr.180190.114), 2014-11-04
Supplement: Dataset_S5.xlsx [file Dataset_S5.xlsx]

## Sheet: Blood vs Urine
	Proportion of Isolates		Corrected		Uncorrected
Factor	Blood	Urine	Estimate	p-value	Estimate	p-value
aufA	0.325843	0.550265	2.70016	0.00946432	-0.928788	0.000565547
aufB	0.337079	0.550265	2.78045	0.00522335	-0.87808	0.00104123
aufD	0.337079	0.550265	2.78045	0.00522335	-0.87808	0.00104123
aufE	0.337079	0.550265	2.78045	0.00522335	-0.87808	0.00104123
ecpD	1	0.952381	3.06401	0.0386351	2.46352	0.0852646
focA	0.168539	0.137566	1.64832	0.000590075	0.239639	0.497529
focC	0.0674157	0.0793651	1.35567	0.0433158	-0.176076	0.725325
focD	0.168539	0.248677	1.13509	0.0255047	-0.490335	0.136622
hek	0.235955	0.280423	0.867844	0.0256466	-0.232622	0.43438
papA	0.325843	0.142857	1.25222	0.000661593	1.06471	0.000530312
papC	0.393258	0.407407	0.854899	0.0273517	-0.0589425	0.822465
papD	0.449438	0.428571	1.18316	0.00241865	0.0847412	0.743409
papE	0.449438	0.444444	0.985777	0.015957	0.0202027	0.937714
papF	0.460674	0.417989	1.07085	0.00791378	0.173404	0.50284
papG	0.359551	0.232804	0.900461	0.0141957	0.615229	0.0280434
papH	0.449438	0.433862	1.15459	0.00329156	0.0631687	0.80713
papJ	0.41573	0.428571	0.902975	0.0200526	-0.0526437	0.839856
papK	0.426966	0.433862	0.970325	0.0119669	-0.0281299	0.91376
papX	0.696629	0.592593	0.834344	0.0298801	0.456604	0.0956699
prfG	0.146067	0.190476	0.919567	0.0442029	-0.318865	0.365976
sfaB	0.202247	0.248677	1.44432	0.00357134	-0.266629	0.394294
sfaD	0.191011	0.248677	1.39662	0.00581293	-0.337773	0.287958
sfaG	0.134831	0.164021	1.12361	0.0222694	-0.230291	0.530682
sfaH	0.123596	0.142857	1.09619	0.0260028	-0.167054	0.66299
sfaS	0.123596	0.0952381	1.71157	0.00173869	0.292478	0.471678
tosA	0.101124	0.0529101	2.25475	0.000300017	0.699999	0.143725
sat	0.539326	0.285714	0.836092	0.0470288	1.07392	5.71248e-05
vat	0	0.126984	-4.18575	0.00886955	-3.58194	0.0172993
kpsF	0.775281	0.756614	1.46176	0.035942	0.104171	0.732977
kpsS	0.808989	0.772487	2.1716	0.011274	0.221046	0.490609
ibeA	0.191011	0.15873	1.0197	0.0101228	0.224254	0.503455
traJ	0.404494	0.153439	1.24749	7.42693e-05	1.32111	7.93534e-06
chuY	0.752809	0.84127	-2.88609	0.0366723	-0.554057	0.0797942
iroB	0.258427	0.354497	0.864333	0.0361367	-0.454832	0.111697
iroE	0.258427	0.354497	0.838947	0.0396914	-0.454832	0.111697
iroN	0.269663	0.354497	0.883086	0.0272758	-0.397005	0.160914
fliCH7	0.134831	0.148148	1.41378	0.0133441	-0.109699	0.767972
iss	0.842697	0.772487	0.998617	0.014698	0.456024	0.178488
neuC	0.292135	0.206349	1.96331	3.63362e-05	0.462035	0.116522
cnf1	0.202247	0.269841	1.15466	0.0155085	-0.37688	0.22506
kpsM	0.696629	0.666667	1.19455	0.00449129	0.13815	0.618538
focH	0.0674157	0.153439	0.238048	0.674659	-0.919203	0.0497649
iha	0.516854	0.328042	0.217589	0.573884	0.784494	0.00282818
sfaA	0.0224719	0.116402	-0.756964	0.34959	-1.74581	0.0199906
tsh	0.269663	0.428571	0.82576	0.0709695	-0.708651	0.0115269
ireA	0.0674157	0.206349	-0.539639	0.301892	-1.28001	0.00533915
iucA	0.550562	0.380952	0.0480322	0.887571	0.688449	0.00822758
iucB	0.550562	0.386243	0.0313497	0.926256	0.666072	0.0104998
iucC	0.550562	0.386243	0.0313497	0.926256	0.666072	0.0104998
iucD	0.606742	0.386243	0.40103	0.224901	0.896767	0.000667034
iutA	0.539326	0.386243	-0.0779802	0.818857	0.62076	0.0169336
sitB	0.303371	0.174603	0.350508	0.337413	0.722051	0.0160383
tcpC	0.11236	0.275132	-0.129111	0.790693	-1.09813	0.00325312
usp	0.539326	0.687831	2.01618	0.115576	-0.632368	0.0167554
clbB	0.179775	0.42328	-0.444266	0.599424	-1.20855	0.000112675
clbN	0.179775	0.42328	-0.444266	0.599424	-1.20855	0.000112675
afaB	0.0449438	0.047619	-0.412298	0.53486	-0.0606246	0.92149
draC	0.0449438	0.0529101	-0.483334	0.459296	-0.171556	0.777123
draD	0.0449438	0.047619	-0.412298	0.53486	-0.0606246	0.92149
focF	0.0337079	0.0899471	0.079341	0.911201	-1.04145	0.10371
focG	0.0561798	0.116402	0.293863	0.623519	-0.794428	0.121632
papB	0.696629	0.613757	0.809087	0.0505593	0.368167	0.180267
papI	0.595506	0.518519	0.0871988	0.810106	0.312665	0.229997
sfaC	0.11236	0.169312	0.698495	0.14632	-0.476353	0.219168
agn43	0.58427	0.513228	0.0697969	0.813743	0.287403	0.268435
pic	0.101124	0.169312	0.784844	0.141686	-0.594292	0.138869
hlyB	0.134831	0.15873	0.651413	0.139133	-0.191192	0.604085
tia	0.213483	0.216931	0.698076	0.0590313	-0.0204161	0.94802
chuS	0.764045	0.825397	-0.631145	0.515251	-0.378363	0.229281
ybtA	0.797753	0.846561	0.310827	0.536736	-0.33557	0.312486
etsC	0.0674157	0.0846561	-0.0964948	0.858206	-0.246378	0.620085
ompT	0.764045	0.84127	-0.0128929	0.975057	-0.492722	0.122822
cvaA	0.146067	0.227513	0.192788	0.636821	-0.543377	0.117057
cvaC	0.0786517	0.0687831	0.294281	0.598441	0.144726	0.76657
kpsT	0.561798	0.619048	0.528486	0.152419	-0.237046	0.363627
rfc	0	0.026455	-2.15955	0.138578	-1.89629	0.186183
traT	0.741573	0.62963	0.456273	0.168587	0.523532	0.0664027
afaA	0.0561798	0.047619	-0.195404	0.753985	0.174353	0.760996
hylF	0.11236	0.0952381	0.356457	0.44784	0.184429	0.658439
ompTp	0.0786517	0.0740741	0.175591	0.747441	0.0649195	0.892832
Dr.II	0	0.021164	-2.31914	0.113781	-1.70316	0.239121
sfaE	0.123596	0.174603	0.772742	0.10354	-0.405465	0.279303
aidA	0.11236	0.0740741	0.533323	0.408236	0.458866	0.292246
kpsC	0.741573	0.756614	0.640941	0.31737	-0.0800427	0.786544
kpsD	0.752809	0.756614	0.988936	0.164142	-0.0205531	0.94511
kpsE	0.752809	0.756614	0.988936	0.164142	-0.0205531	0.94511
kpsU	0.741573	0.751323	0.694792	0.295562	-0.0515189	0.861305
aslA	0.842697	0.878307	-0.0612864	0.942886	-0.298063	0.415982
chuA	0.775281	0.846561	-8.6028	0.999537	-0.469504	0.147825
chuT	0.775281	0.846561	-8.6028	0.999537	-0.469504	0.147825
chuU	0.775281	0.846561	-8.6028	0.999537	-0.469504	0.147825
chuW	0.775281	0.846561	-8.6028	0.999537	-0.469504	0.147825
chuX	0.808989	0.846561	1.80812	0.134721	-0.264425	0.43243
iroC	0.235955	0.343915	0.835746	0.0530732	-0.529091	0.0708608
iroD	0.235955	0.349206	0.751991	0.0764141	-0.552456	0.0590302
irp1	0.741573	0.751323	0.425288	0.285417	-0.0515189	0.861305
irp2	0.786517	0.804233	0.50177	0.261345	-0.108906	0.731234
ybtE	0.797753	0.84127	0.219889	0.677075	-0.295399	0.371525
ybtP	0.786517	0.84127	0.246234	0.610435	-0.363651	0.265259
ybtQ	0.786517	0.846561	0.110749	0.824286	-0.403822	0.218432
ybtS	0.786517	0.851852	-0.252891	0.647546	-0.445144	0.177279
ybtT	0.797753	0.851852	0.0115767	0.984027	-0.376892	0.259191
ybtU	0.786517	0.851852	-0.414284	0.448367	-0.445144	0.177279
ybtX	0.786517	0.851852	-0.252891	0.647546	-0.445144	0.177279
fuyA	0.797753	0.851852	0.0115767	0.984027	-0.376892	0.259191
ecpA	1	0.957672	2.88168	0.0500278	2.34337	0.100998
ecpB	1	0.957672	2.88168	0.0500278	2.34337	0.100998
ecpC	1	0.957672	2.88168	0.0500278	2.34337	0.100998
ecpE	1	0.957672	2.88168	0.0500278	2.34337	0.100998
ecpR	0.988764	0.957672	2.01564	0.0712751	1.35828	0.203723
fimA	0.898876	0.941799	-0.536635	0.294953	-0.599086	0.20168
fimE	0.94382	0.941799	0.0808502	0.893477	0.0374906	0.946179
fimF	0.955056	0.957672	0.167281	0.805947	-0.0626986	0.920263
fimG	0.955056	0.957672	0.167281	0.805947	-0.0626986	0.920263
fimH	0.955056	0.957672	0.167281	0.805947	-0.0626986	0.920263
fimI	0.932584	0.941799	-0.130292	0.820902	-0.156807	0.76503

## Sheet: Phylogroup
	Proportion of Isolates				Corrected												Uncorrected
					A to B1		A to B2		A to D		B1 to B2		B1 to D		B2 to D		A to B1		A to B2		A to D		B1 to B2		B1 to D		B2 to D
Factor	A	B1	B2	D	Estimate	p-value	Estimate	p-value	Estimate	p-value	Estimate	p-value	Estimate	p-value	Estimate	p-value	Estimate	p-value	Estimate	p-value	Estimate	p-value	Estimate	p-value	Estimate	p-value	Estimate	p-value
aufA	0.0416667	0	0.693989	0.106383	1.43222	0.802562	-2.09886	0.24156	0.367537	0.988496	-3.53108	0.202044	-1.06468	0.936452	2.4664	0.00810632	1.55011	0.748967	-3.6942	1.77658e-05	-0.713342	0.843886	-5.2443	0.00303419	-2.26345	0.47315	2.98085	1.08375e-08
aufB	0.0416667	0.0416667	0.693989	0.106383	0.0780648	0.999944	-2.04543	0.602502	0.505767	0.991324	-2.12349	0.608876	0.427702	0.995268	2.55119	0.0111133	1.05439e-14	1	-3.95433	0.00075889	-1.00726	0.807507	-3.95433	0.00075889	-1.00726	0.807507	2.94707	2.2295e-08
aufD	0.0416667	0.0416667	0.693989	0.106383	0.0780648	0.999944	-2.04543	0.602502	0.505767	0.991324	-2.12349	0.608876	0.427702	0.995268	2.55119	0.0111133	1.05439e-14	1	-3.95433	0.00075889	-1.00726	0.807507	-3.95433	0.00075889	-1.00726	0.807507	2.94707	2.2295e-08
aufE	0.0416667	0.0416667	0.693989	0.106383	0.0780648	0.999944	-2.04543	0.602502	0.505767	0.991324	-2.12349	0.608876	0.427702	0.995268	2.55119	0.0111133	1.05439e-14	1	-3.95433	0.00075889	-1.00726	0.807507	-3.95433	0.00075889	-1.00726	0.807507	2.94707	2.2295e-08
ecpD	0.708333	0.958333	0.994536	1	-2.10913	0.106439	-0.327993	0.994109	-1.48321	0.827887	1.78114	0.67061	0.625919	0.98881	-1.15522	0.936273	-1.71854	0.23607	-3.76125	0.000271931	-3.81988	0.0735795	-2.04271	0.29418	-2.10134	0.623813	-0.0586253	0.999986
focA	0	0.0833333	0.213115	0	-1.20129	0.762792	-2.7813	0.16072	0.813317	0.966252	-1.58001	0.595925	2.0146	0.723061	3.59461	0.220369	-1.44423	0.637838	-2.69469	0.0680505	1.24088	0.872806	-1.25045	0.374213	2.68511	0.404843	3.93557	0.0660603
focC	0	0	0.114754	0	0.0741593	0.999988	-0.483823	0.994186	0.354649	0.997968	-0.557982	0.99746	0.280489	0.999706	0.838471	0.984493	0.417152	0.996529	-3.14279	0.217946	0.637524	0.985977	-3.55994	0.368587	0.220373	0.999772	3.78031	0.226852
focD	0	0.0416667	0.333333	0	-0.488408	0.983512	-3.65969	0.0525616	0.402229	0.996677	-3.17129	0.108383	0.890636	0.977424	4.06192	0.230608	-0.885844	0.914776	-3.54708	0.0157463	1.10436	0.912253	-2.66123	0.053067	1.9902	0.710482	4.65144	0.0253682
hek	0.0833333	0.208333	0.349727	0.0638298	-0.9547	0.711861	-1.22649	0.765456	-0.468785	0.982629	-0.271791	0.995972	0.485915	0.977243	0.757706	0.834873	-1.06289	0.633337	-1.77765	0.0859162	0.287682	0.990346	-0.714761	0.525328	1.35058	0.307496	2.06534	0.0045054
papA	0	0	0.213115	0.361702	0.823628	0.963876	-2.09292	0.322802	-1.002	0.83317	-2.91654	0.41919	-1.82563	0.76414	1.09091	0.453358	0.991024	0.934221	-2.46769	0.0994128	-3.1842	0.019435	-3.45872	0.166638	-4.17523	0.0658896	-0.716512	0.177404
papC	0.0833333	0.0416667	0.497268	0.382979	0.486786	0.980738	1.97703	0.491934	2.82687	0.135552	1.49024	0.798547	2.34009	0.428942	0.849842	0.632038	0.737599	0.936571	-2.38697	0.00834692	-1.92097	0.0752932	-3.12457	0.0131836	-2.65857	0.060334	0.465995	0.503695
papD	0.0833333	0.0833333	0.540984	0.382979	-0.204698	0.997385	0.953083	0.890792	2.1527	0.31557	1.15778	0.841562	2.35739	0.276018	1.19961	0.339208	-1.43229e-14	1	-2.5622	0.00375963	-1.92097	0.0752932	-2.5622	0.00375963	-1.92097	0.0752932	0.641227	0.221426
papE	0.0833333	0.0416667	0.540984	0.468085	0.418354	0.987681	2.35765	0.382061	3.71124	0.0337928	1.93929	0.669004	3.29289	0.16779	1.35359	0.341399	0.737599	0.936571	-2.5622	0.00375963	-2.27006	0.0221991	-3.2998	0.00759636	-3.00766	0.0240258	0.292136	0.80946
papF	0	0.0833333	0.52459	0.468085	-2.37229	0.307718	-0.381558	0.98962	0.925451	0.869839	1.99073	0.422287	3.29774	0.0401836	1.30701	0.305736	-0.715916	0.901182	-3.30785	0.000885615	-3.05778	0.00394087	-2.59194	0.00271146	-2.34186	0.0147259	0.250074	0.869899
papG	0	0	0.31694	0.382979	0.343498	0.998163	-1.03753	0.867056	0.13268	0.999634	-1.38103	0.927687	-0.210819	0.999696	1.17021	0.44937	0.989669	0.935116	-3.016	0.0301927	-3.28366	0.0174439	-4.00567	0.0814096	-4.27333	0.058154	-0.267659	0.859593
papH	0.0833333	0.0416667	0.551913	0.382979	0.523455	0.976175	1.02184	0.870793	2.21196	0.296446	0.498388	0.988991	1.68851	0.672145	1.19012	0.345339	0.737599	0.936571	-2.6063	0.00305043	-1.92097	0.0752932	-3.3439	0.00658222	-2.65857	0.060334	0.685325	0.171108
papJ	0.0833333	0.0416667	0.530055	0.382979	0.436697	0.985969	2.35573	0.351529	3.18191	0.082994	1.91903	0.655773	2.74522	0.302323	0.826184	0.65281	0.737599	0.936571	-2.51826	0.00461503	-1.92097	0.0752932	-3.25586	0.00874641	-2.65857	0.060334	0.597288	0.280603
papK	0.0833333	0.0416667	0.540984	0.382979	0.542538	0.973586	0.89572	0.906919	2.1056	0.333962	0.353182	0.99594	1.56306	0.719635	1.20988	0.331003	0.737599	0.936571	-2.5622	0.00375963	-1.92097	0.0752932	-3.2998	0.00759636	-2.65857	0.060334	0.641227	0.221426
papX	0.166667	0.125	0.759563	0.595745	-0.104877	0.9993	1.97637	0.41277	3.18454	0.0292163	2.08125	0.437315	3.28942	0.0423544	1.20817	0.463843	0.336472	0.977112	-2.75972	9.36021e-06	-1.9972	0.00740882	-3.09619	8.23539e-06	-2.33368	0.00368976	0.762519	0.118584
prfG	0	0.0833333	0.256831	0	-1.22997	0.747028	-2.37442	0.284423	0.772124	0.970935	-1.14444	0.813512	2.0021	0.729764	3.14654	0.339602	-1.44759	0.640166	-2.94321	0.0394826	1.24052	0.873535	-1.49562	0.216149	2.6881	0.405007	4.18372	0.0443541
sfaB	0	0.0833333	0.344262	0	-1.07905	0.812049	-3.41251	0.0554769	0.482886	0.99382	-2.33346	0.236612	1.56194	0.87478	3.8954	0.228672	-1.46176	0.640878	-3.37783	0.0141608	1.23442	0.876401	-1.91607	0.0635986	2.69618	0.405124	4.61225	0.021287
sfaD	0	0.0833333	0.338798	0	-1.01006	0.841398	-3.49769	0.0496779	0.453997	0.994963	-2.48762	0.191305	1.46406	0.896653	3.95168	0.226455	-1.4607	0.640927	-3.35235	0.0150734	1.23492	0.876192	-1.89165	0.068926	2.69563	0.405122	4.58727	0.0222516
sfaG	0	0	0.234973	0	0.545601	0.991975	-4.53261	0.0775938	0.300059	0.998831	-5.07821	0.115801	-0.245542	0.999726	4.83267	0.194987	0.397793	0.997099	-4.09364	0.0854683	0.612488	0.988104	-4.49143	0.194551	0.214695	0.999797	4.70612	0.0975084
sfaH	0	0.0416667	0.202186	0	-0.601445	0.970503	-3.10607	0.127905	0.706942	0.978863	-2.50463	0.299297	1.30839	0.919385	3.81302	0.205275	-0.865903	0.916759	-2.84014	0.070205	1.11311	0.90874	-1.97423	0.232631	1.97902	0.710961	3.95325	0.0760449
sfaS	0	0.0416667	0.153005	0	-0.632868	0.967645	-2.89773	0.189755	0.990666	0.941702	-2.26486	0.423524	1.62353	0.848222	3.8884	0.153071	-0.865881	0.915548	-2.49909	0.132897	1.11073	0.908695	-1.63321	0.402393	1.97661	0.711106	3.60982	0.123655
tosA	0	0.0416667	0.0983607	0	-0.976439	0.906827	-0.786285	0.954868	0.543733	0.990959	0.190153	0.999578	1.52017	0.902184	1.33002	0.917529	-0.885062	0.909377	-2.01307	0.29325	1.09359	0.91202	-1.128	0.709554	1.97865	0.71105	3.10666	0.233618
sat	0	0	0.431694	0.489362	0.40065	0.996893	-0.963184	0.882397	-0.250412	0.997195	-1.36383	0.926054	-0.651062	0.990482	0.712772	0.826684	0.9702	0.939934	-3.55358	0.00957237	-3.76434	0.00630299	-4.52378	0.0393503	-4.73454	0.0299099	-0.21076	0.917396
vat	0	0	0.131148	0	-0.0525216	0.999997	-1.82162	0.845071	2.16708	0.778892	-1.7691	0.951968	2.2196	0.913705	3.98869	0.284093	0.415192	0.996595	-3.30578	0.186415	0.635127	0.986227	-3.72097	0.332001	0.219936	0.999774	3.94091	0.197025
kpsF	0.0416667	0	0.939891	0.829787	1.31356	0.839287	-1.18012	0.70654	-1.24131	0.619535	-2.49368	0.514793	-2.55487	0.463451	-0.0611885	0.999879	1.60346	0.733564	-5.54686	7.45767e-10	-4.36088	6.04068e-06	-7.15031	2.15302e-05	-5.96434	0.00074994	1.18597	0.0713441
kpsS	0	0.125	0.939891	0.914894	-1.5974	0.40767	-1.22797	0.731326	-1.58075	0.521815	0.36943	0.99173	0.0166477	0.999999	-0.352783	0.987417	-1.25508	0.639685	-6.0346	7.04842e-09	-5.61052	7.72006e-07	-4.77953	<1.00E-07	-4.35544	2.99312e-07	0.424082	0.889174
ibeA	0	0.0416667	0.218579	0.12766	-0.0995062	0.999794	-3.86041	0.00990485	-3.95997	0.00676955	-3.76091	0.019436	-3.86047	0.0131181	-0.0995607	0.999312	-0.237372	0.996874	-2.15153	0.0731374	-1.45454	0.415234	-1.91415	0.192211	-1.21717	0.643336	0.696986	0.455427
traJ	0.375	0.25	0.213115	0.234043	0.495082	0.865399	1.39772	0.614355	2.41165	0.114963	0.902641	0.88472	1.91656	0.349079	1.01392	0.562988	0.587787	0.78909	0.795426	0.305876	0.674798	0.601758	0.207639	0.976527	0.0870114	0.998821	-0.120628	0.989662
chuY	0	0	0.983607	0.978723	0.760204	0.973345	-2.6034	0.30901	-3.82721	0.0837511	-3.36361	0.397488	-4.58741	0.163674	-1.22381	0.835806	0.721157	0.979796	-8.44961	1.76227e-06	-8.05482	3.41821e-05	-9.17077	3.88206e-05	-8.77598	0.000253173	0.394792	0.982569
iroB	0.25	0.291667	0.420765	0	0.168638	0.992966	-1.95971	0.184005	1.38029	0.812977	-2.12835	0.187163	1.21165	0.880751	3.34	0.162744	-0.208071	0.985958	-0.783349	0.330301	3.84333	0.0752032	-0.575278	0.598837	4.0514	0.059102	4.62667	0.0164784
iroE	0.25	0.291667	0.420765	0	0.141506	0.995783	-1.85309	0.215794	1.53768	0.752859	-1.99459	0.226622	1.39617	0.824572	3.39076	0.144457	-0.208071	0.985958	-0.783349	0.330301	3.84333	0.0752032	-0.575278	0.598837	4.0514	0.059102	4.62667	0.0164784
iroN	0.25	0.291667	0.42623	0	0.142869	0.995641	-2.2849	0.0899935	1.67171	0.69874	-2.42776	0.102133	1.52884	0.778242	3.9566	0.0643042	-0.207087	0.986148	-0.804595	0.306195	3.84462	0.0751138	-0.597508	0.567908	4.05171	0.0591241	4.64922	0.01578
fliCH7	0	0.0416667	0.213115	0	-1.56165	0.786444	-0.449475	0.991628	5.0657	0.110173	1.11217	0.91771	6.62735	0.0336416	5.51518	0.0207974	-0.866835	0.91679	-2.90812	0.0613844	1.11295	0.908913	-2.04128	0.205747	1.97979	0.710925	4.02107	0.06878
iss	0.416667	0.5	0.885246	0.787234	-0.810429	0.528896	3.62977	0.0348559	2.07023	0.228895	4.4402	0.0108183	2.88066	0.0656961	-1.55953	0.254362	-0.336472	0.938509	-2.37955	3.23348e-06	-1.64481	0.0139125	-2.04307	8.05638e-05	-1.30833	0.0744646	0.734741	0.309146
neuC	0	0.0833333	0.295082	0.191489	-1.47153	0.60143	-0.17673	0.998643	-0.374866	0.986035	1.2948	0.731285	1.09667	0.789644	-0.198137	0.993198	-0.729213	0.890593	-2.35184	0.0269397	-1.74413	0.202288	-1.62263	0.129145	-1.01491	0.596791	0.607716	0.438032
cnf1	0	0.0416667	0.371585	0	-0.814449	0.933187	-1.93493	0.517867	0.824535	0.965419	-1.12048	0.888206	1.63898	0.854262	2.75946	0.445862	-0.89346	0.913684	-3.72451	0.0104916	1.10032	0.913541	-2.83105	0.0343028	1.99378	0.71032	4.82483	0.0189097
kpsM	0	0.0833333	0.852459	0.638298	-0.926904	0.813391	-1.93139	0.28682	-1.57034	0.42152	-1.00449	0.824538	-0.643432	0.934242	0.361058	0.955291	-0.786992	0.884232	-5.03794	4.48396e-07	-3.83331	0.000357376	-4.25094	1.39306e-07	-3.04632	0.00067551	1.20463	0.00542697
focH	0	0.0416667	0.185792	0	-1.10872	0.884205	-0.605999	0.979313	0.687523	0.981022	0.502724	0.993356	1.79625	0.850257	1.29352	0.91251	-0.865016	0.91658	-2.73346	0.0862775	1.11296	0.90857	-1.86844	0.279578	1.97797	0.71101	3.84642	0.0888143
iha	0.0416667	0.0833333	0.442623	0.510638	-1.25083	0.757829	0.774331	0.963878	1.22492	0.832922	2.02516	0.554683	2.47575	0.250469	0.450589	0.952917	-0.737599	0.936571	-2.90497	0.0252244	-3.17805	0.0147518	-2.16737	0.0209841	-2.44045	0.0114094	-0.273083	0.838452
sfaA	0	0	0.131148	0	0.538096	0.992218	-1.90885	0.708831	0.244473	0.999381	-2.44695	0.730139	-0.293623	0.999556	2.15333	0.814155	0.415192	0.996595	-3.30578	0.186415	0.635127	0.986227	-3.72097	0.332001	0.219936	0.999774	3.94091	0.197025
tsh	0	0	0.546448	0.106383	0.971675	0.944917	-6.34525	0.000522354	-5.29694	0.00444471	-7.31693	0.00153029	-6.26861	0.00799154	1.04831	0.569402	0.936421	0.945521	-4.07736	0.00129346	-1.69599	0.455005	-5.01378	0.017522	-2.63241	0.436254	2.38137	1.21274e-05
ireA	0.0416667	0.0833333	0.224044	0.0212766	-0.814351	0.920949	3.58444	0.354885	5.0949	0.0987156	4.39879	0.196624	5.90925	0.0387456	1.51046	0.767858	-0.737599	0.936594	-1.89324	0.261027	0.693147	0.96303	-1.15564	0.424536	1.43075	0.662891	2.58639	0.0568821
iucA	0.291667	0.333333	0.448087	0.510638	-0.776365	0.623688	4.14252	0.0148983	4.20866	0.00192174	4.91888	0.00485073	4.98502	0.000403837	0.0661394	0.999811	-0.194156	0.989557	-0.678902	0.47732	-0.929863	0.304866	-0.484746	0.714623	-0.735707	0.493681	-0.250961	0.869621
iucB	0.291667	0.333333	0.453552	0.510638	-0.782246	0.618175	4.23044	0.0121809	4.28757	0.00151713	5.01269	0.00387318	5.06981	0.000310856	0.0571217	0.999877	-0.194156	0.989557	-0.700974	0.44845	-0.929863	0.304866	-0.506818	0.685128	-0.735707	0.493681	-0.228889	0.897456
iucC	0.291667	0.333333	0.453552	0.510638	-0.782246	0.618175	4.23044	0.0121809	4.28757	0.00151713	5.01269	0.00387318	5.06981	0.000310856	0.0571217	0.999877	-0.194156	0.989557	-0.700974	0.44845	-0.929863	0.304866	-0.506818	0.685128	-0.735707	0.493681	-0.228889	0.897456
iucD	0.333333	0.333333	0.469945	0.531915	-0.522729	0.84058	3.49944	0.0412853	3.95763	0.00218262	4.02217	0.0230858	4.48035	0.00095667	0.458188	0.951274	-1.75278e-15	1	-0.572783	0.593914	-0.820981	0.39509	-0.572783	0.593914	-0.820981	0.39509	-0.248197	0.87353
iutA	0.291667	0.333333	0.442623	0.531915	-0.75084	0.648044	4.04238	0.0190048	4.15442	0.00212237	4.79322	0.00658877	4.90526	0.000473353	0.112042	0.999145	-0.194156	0.989557	-0.65678	0.506749	-1.01514	0.230426	-0.462624	0.743364	-0.820981	0.39509	-0.358357	0.694179
sitB	0.541667	0.458333	0.0928962	0.404255	0.626591	0.71153	-1.67858	0.509923	0.251046	0.994141	-2.30517	0.279532	-0.375545	0.983814	1.92963	0.182031	0.334108	0.93909	2.44583	2.41135e-06	0.55482	0.691891	2.11172	7.14427e-05	0.220711	0.97225	-1.89101	8.1907e-06
tcpC	0	0	0.333333	0.0212766	0.562317	0.990276	-1.24534	0.799795	-0.212477	0.998692	-1.80765	0.82918	-0.774794	0.983772	1.03286	0.798664	0.722454	0.976886	-3.64991	0.0154546	-0.419658	0.989407	-4.37237	0.0802484	-1.14211	0.939267	3.23025	0.00595562
usp	0	0	0.939891	0.12766	0.451822	0.995497	-1.36998	0.742796	-0.152861	0.999445	-1.8218	0.847119	-0.604683	0.99284	1.21712	0.491963	0.881216	0.956745	-6.7579	2.27044e-07	-2.04409	0.348105	-7.63911	0.000107006	-2.92531	0.363085	4.71381	<1.00E-07
clbB	0	0	0.52459	0	-0.0514317	0.999997	-1.08623	0.940734	1.21525	0.921237	-1.0348	0.987645	1.26668	0.978009	2.30147	0.594055	0.353362	0.998104	-5.56336	0.0193904	0.552909	0.991899	-5.91672	0.0661882	0.199547	0.99985	6.11627	0.0250001
clbN	0	0	0.52459	0	-0.0514317	0.999997	-1.08623	0.940734	1.21525	0.921237	-1.0348	0.987645	1.26668	0.978009	2.30147	0.594055	0.353362	0.998104	-5.56336	0.0193904	0.552909	0.991899	-5.91672	0.0661882	0.199547	0.99985	6.11627	0.0250001
afaB	0	0	0.0546448	0.0638298	0.611197	0.987055	-0.794164	0.939407	-0.865329	0.920849	-1.40536	0.913343	-1.47653	0.89852	-0.0711651	0.999919	0.827711	0.962159	-1.21977	0.671438	-1.3087	0.661641	-2.04749	0.646345	-2.13641	0.637611	-0.0889293	0.999216
draC	0	0	0.0601093	0.0638298	0.671997	0.982101	-1.05214	0.866385	-0.864256	0.91808	-1.72414	0.843834	-1.53625	0.88162	0.187885	0.998339	0.837347	0.960711	-1.30197	0.620389	-1.28974	0.670313	-2.13932	0.610213	-2.12708	0.639026	0.0122344	0.999998
draD	0	0	0.0546448	0.0638298	0.611197	0.987055	-0.794164	0.939407	-0.865329	0.920849	-1.40536	0.913343	-1.47653	0.89852	-0.0711651	0.999919	0.827711	0.962159	-1.21977	0.671438	-1.3087	0.661641	-2.04749	0.646345	-2.13641	0.637611	-0.0889293	0.999216
focF	0	0.0416667	0.103825	0	-1.65564	0.776518	0.0834813	0.999951	0.667774	0.983079	1.73912	0.842739	2.32341	0.759849	0.584293	0.991414	-0.88135	0.910448	-2.06937	0.269741	1.09662	0.911378	-1.18802	0.673693	1.97797	0.711077	3.16599	0.217828
focG	0	0.0416667	0.142077	0	-1.77751	0.744611	0.0900589	0.999938	0.745951	0.976053	1.86757	0.811183	2.52346	0.706805	0.655892	0.987099	-0.867389	0.914899	-2.41324	0.154505	1.10902	0.908953	-1.54586	0.453355	1.97641	0.71112	3.52227	0.139059
papB	0.125	0.125	0.797814	0.553191	-0.538397	0.930432	2.16248	0.408325	3.91635	0.0118587	2.70088	0.261878	4.45474	0.00554306	1.75386	0.207058	-1.94717e-14	1	-3.3186	1.56414e-06	-2.15948	0.00860363	-3.3186	1.56414e-06	-2.15948	0.00860363	1.15911	0.00455883
papI	0.0833333	0.0833333	0.661202	0.553191	-0.496394	0.965764	1.23526	0.825168	3.32702	0.0492954	1.73165	0.660429	3.82342	0.0245161	2.09176	0.193874	6.3357e-15	1	-3.06655	0.000285753	-2.61147	0.00562373	-3.06655	0.000285753	-2.61147	0.00562373	0.455082	0.518804
sfaC	0	0.0416667	0.224044	0	-0.614235	0.967563	-2.62537	0.243714	0.564096	0.989687	-2.01114	0.512015	1.17833	0.943691	3.18947	0.391539	-0.867985	0.916765	-2.97389	0.0537961	1.11262	0.909123	-2.1059	0.181953	1.98061	0.710888	4.08651	0.0623451
agn43	0.25	0.416667	0.590164	0.531915	-0.985302	0.403551	0.473775	0.965377	0.588601	0.914798	1.45908	0.497821	1.5739	0.322349	0.114826	0.998005	-0.76214	0.617466	-1.46326	0.0164282	-1.22645	0.120247	-0.701115	0.383359	-0.464306	0.796269	0.23681	0.888997
pic	0	0.0416667	0.218579	0	-0.701512	0.957256	-1.4938	0.760812	0.488841	0.993709	-0.792287	0.968952	1.19035	0.950011	1.98264	0.778717	-0.867386	0.916784	-2.94127	0.0574492	1.11281	0.909014	-2.07388	0.193486	1.98019	0.710907	4.05407	0.0654666
hlyB	0	0.0416667	0.224044	0	-1.16153	0.849567	-1.60683	0.653011	1.75906	0.741693	-0.445301	0.990921	2.92059	0.449898	3.36589	0.193073	-0.867985	0.916765	-2.97389	0.0537961	1.11262	0.909123	-2.1059	0.181953	1.98061	0.710888	4.08651	0.0623451
tia	0.166667	0.0833333	0.262295	0.12766	0.779696	0.833456	0.842163	0.908618	0.88389	0.868909	0.0624672	0.999969	0.104194	0.999819	0.0417267	0.999956	0.788457	0.826583	-0.575364	0.746921	0.312375	0.97045	-1.36382	0.272707	-0.476082	0.945238	0.887739	0.229886
chuS	0	0	0.978142	0.957447	0.768097	0.972175	-2.32104	0.375102	-3.36777	0.0953483	-3.08914	0.458011	-4.13587	0.199391	-1.04673	0.836163	0.746134	0.977113	-8.10837	1.74935e-06	-7.36279	4.13605e-05	-8.8545	4.83371e-05	-8.10892	0.00039183	0.745577	0.809995
ybtA	0.333333	0.291667	0.983607	0.765957	-0.534795	0.856377	3.93416	0.176005	3.98046	0.0510961	4.46896	0.136115	4.51525	0.0359488	0.0462935	0.99998	0.194156	0.989557	-4.78749	<1.00E-07	-1.87877	0.00384043	-4.98165	<1.00E-07	-2.07293	0.00143363	2.90872	0.000101153
etsC	0.166667	0.25	0.0655738	0	-0.391948	0.9395	-0.135416	0.999329	2.03399	0.602677	0.256531	0.996639	2.42594	0.497818	2.16941	0.584656	-0.601196	0.808704	0.895397	0.423529	3.15942	0.167766	1.49659	0.0313385	3.76062	0.0741799	2.26403	0.441882
ompT	0.208333	0.5	0.972678	0.680851	-1.51687	0.0960499	-2.42098	0.277623	0.184584	0.998326	-0.904117	0.917826	1.70145	0.434625	2.60557	0.0687181	-1.335	0.165877	-4.90735	<1.00E-07	-2.09269	0.00231906	-3.57235	2.92522e-08	-0.757686	0.453931	2.81466	1.97101e-06
cvaA	0.25	0.333333	0.229508	0	-0.157698	0.994045	-0.25799	0.993695	1.64093	0.714683	-0.100292	0.999714	1.79862	0.68525	1.89892	0.630098	-0.43096	0.888644	0.0623617	0.99919	3.79376	0.078813	0.493321	0.703886	4.22472	0.0422409	3.7314	0.0783921
cvaC	0.25	0.291667	0.0382514	0	-0.088925	0.999008	0.644801	0.945611	3.01494	0.317738	0.733726	0.940821	3.10386	0.331681	2.37014	0.54904	-0.330951	0.950051	1.92797	0.005019	3.68432	0.088269	2.25892	0.000476061	4.01527	0.0565917	1.75635	0.680434
kpsT	0	0.0833333	0.79235	0.425532	-0.93123	0.811699	-1.55545	0.468061	-1.65792	0.363279	-0.62422	0.948911	-0.72669	0.906499	-0.10247	0.998711	-0.751516	0.892201	-4.58612	2.29113e-06	-2.92513	0.00850052	-3.83461	2.05944e-06	-2.17361	0.0289654	1.66099	9.3483e-06
rfc	0	0	0.0273224	0	0.301213	0.998869	-1.49621	0.841748	0.583236	0.990517	-1.79742	0.896484	0.282023	0.999613	2.07944	0.794661	0.371563	0.997593	-1.71873	0.691902	0.571491	0.989808	-2.09029	0.784269	0.199928	0.999836	2.29022	0.667955
traT	0.541667	0.416667	0.715847	0.659574	-0.0808197	0.999135	5.79406	3.68738e-05	4.45983	0.000192444	5.87488	9.91837e-05	4.54065	0.000427335	-1.33423	0.279825	0.503526	0.823182	-0.7569	0.315616	-0.494344	0.769544	-1.26043	0.0240774	-0.997871	0.21379	0.262555	0.875476
afaA	0	0	0.0601093	0.0638298	0.597958	0.98798	-0.777825	0.942846	-0.839585	0.927199	-1.37578	0.918836	-1.43754	0.906322	-0.0617598	0.999947	0.837347	0.960711	-1.30197	0.620389	-1.28974	0.670313	-2.13932	0.610213	-2.12708	0.639026	0.0122344	0.999998
hylF	0.25	0.333333	0.0765027	0	-0.195308	0.988623	-0.692374	0.902839	2.06968	0.571489	-0.497066	0.970097	2.26499	0.532624	2.76205	0.346603	-0.491714	0.848002	1.25361	0.0777903	3.71668	0.0853862	1.74532	0.00299494	4.2084	0.041212	2.46308	0.391316
ompTp	0.25	0.291667	0.0437158	0	-0.0921887	0.99888	0.465195	0.976317	2.96009	0.323047	0.557384	0.970182	3.05227	0.33523	2.49489	0.490373	-0.329362	0.950616	1.79838	0.0083875	3.68685	0.0880928	2.12774	0.000837666	4.01622	0.0566509	1.88847	0.625693
Dr.II	0	0	0.0163934	0.0212766	0.401857	0.996979	-0.00986702	1	-1.06849	0.920348	-0.411724	0.998302	-1.47034	0.932822	-1.05862	0.939512	0.561396	0.989789	-0.603172	0.962637	-0.729015	0.949408	-1.16457	0.934447	-1.29041	0.924772	-0.125844	0.999516
sfaE	0	0.0833333	0.229508	0	-1.06896	0.823681	-3.17346	0.0925017	0.769707	0.971714	-2.10449	0.348597	1.83867	0.779386	3.94316	0.161191	-1.44502	0.638947	-2.7912	0.055301	1.24108	0.872989	-1.34618	0.306557	2.6861	0.404917	4.03228	0.0566995
aidA	0	0.875	0.00546448	0.0425532	-5.10903	8.723e-05	-0.70769	0.963505	-1.36405	0.765612	4.40134	0.0425509	3.74497	0.0685046	-0.656362	0.97665	-6.11249	8.47395e-06	0.738784	0.936582	-1.02817	0.839266	6.85128	<1.00E-07	5.08432	3.54267e-07	-1.76695	0.373191
kpsC	0	0	0.928962	0.829787	0.647447	0.984165	-0.900688	0.89828	-1.64315	0.534939	-1.54813	0.878097	-2.2906	0.662846	-0.742467	0.841733	0.825839	0.966787	-6.71654	8.42906e-06	-5.70959	0.000299452	-7.54238	0.000273782	-6.53543	0.00262953	1.00695	0.148143
kpsD	0	0	0.934426	0.829787	0.600624	0.987777	-0.745379	0.940368	-1.56897	0.579123	-1.346	0.919468	-2.16959	0.710313	-0.823592	0.802213	0.823362	0.967155	-6.80721	6.77349e-06	-5.71588	0.000308841	-7.63057	0.000232842	-6.53924	0.00265948	1.09133	0.106944
kpsE	0	0	0.934426	0.829787	0.600624	0.987777	-0.745379	0.940368	-1.56897	0.579123	-1.346	0.919468	-2.16959	0.710313	-0.823592	0.802213	0.823362	0.967155	-6.80721	6.77349e-06	-5.71588	0.000308841	-7.63057	0.000232842	-6.53924	0.00265948	1.09133	0.106944
kpsU	0	0	0.923497	0.829787	0.509127	0.993106	-0.316356	0.995193	-1.624	0.567643	-0.825483	0.98128	-2.13312	0.739909	-1.30764	0.453415	0.828174	0.966437	-6.63194	1.03558e-05	-5.70368	0.000290818	-7.46011	0.000318529	-6.53186	0.00260171	0.928255	0.198222
aslA	0.5	0	0.994536	1	3.86606	0.0822625	-0.320659	0.994203	-0.322686	0.998414	-4.18671	0.166548	-4.18874	0.35011	-0.00202694	1	4.40542	0.0424886	-4.84562	9.13246e-07	-4.98376	0.0174396	-9.25104	3.29779e-06	-9.38918	0.00034765	-0.138139	0.999854
chuA	0	0	0.994536	1	0.370593	0.997861	-1.93705	0.77506	-0.911867	0.963785	-2.30764	0.849324	-1.28246	0.966854	1.02518	0.976456	0.64755	0.986385	-9.63726	3.13993e-06	-10.1801	0.00114239	-10.2848	2.91434e-05	-10.8277	0.00178114	-0.542849	0.995985
chuT	0	0	0.994536	1	0.370593	0.997861	-1.93705	0.77506	-0.911867	0.963785	-2.30764	0.849324	-1.28246	0.966854	1.02518	0.976456	0.64755	0.986385	-9.63726	3.13993e-06	-10.1801	0.00114239	-10.2848	2.91434e-05	-10.8277	0.00178114	-0.542849	0.995985
chuU	0	0	0.994536	1	0.370593	0.997861	-1.93705	0.77506	-0.911867	0.963785	-2.30764	0.849324	-1.28246	0.966854	1.02518	0.976456	0.64755	0.986385	-9.63726	3.13993e-06	-10.1801	0.00114239	-10.2848	2.91434e-05	-10.8277	0.00178114	-0.542849	0.995985
chuW	0	0	0.994536	1	0.370593	0.997861	-1.93705	0.77506	-0.911867	0.963785	-2.30764	0.849324	-1.28246	0.966854	1.02518	0.976456	0.64755	0.986385	-9.63726	3.13993e-06	-10.1801	0.00114239	-10.2848	2.91434e-05	-10.8277	0.00178114	-0.542849	0.995985
chuX	0.0416667	0.0416667	1	1	0.16718	0.998764	-7.8677	0.0238865	-6.1588	0.0766674	-8.03488	0.0318031	-6.32598	0.0929116	1.7089	0.945423	0.240248	0.996271	-9.47558	3.20956e-05	-8.18102	0.000738679	-9.71583	3.24614e-05	-8.42127	0.000721478	1.29456	0.96722
iroC	0.25	0.291667	0.398907	0	0.0922934	0.998883	-0.441225	0.972181	1.96295	0.605268	-0.533518	0.964503	1.87065	0.678489	2.40417	0.414994	-0.21219	0.985144	-0.697719	0.436624	3.83792	0.0755821	-0.485529	0.720578	4.05011	0.0590112	4.53564	0.0195877
iroD	0.25	0.291667	0.404372	0	0.10646	0.998264	-0.791643	0.858716	1.73215	0.692961	-0.898103	0.848961	1.62569	0.762615	2.5238	0.37577	-0.211132	0.985356	-0.719235	0.408686	3.8393	0.0754841	-0.508103	0.690807	4.05044	0.0590343	4.55854	0.0187601
irp1	0.333333	0.208333	0.89071	0.680851	0.207515	0.989998	2.90994	0.114778	2.43827	0.119903	2.70243	0.219982	2.23076	0.244905	-0.471665	0.936024	0.641854	0.767973	-2.79117	9.57565e-08	-1.45083	0.0335178	-3.43302	3.77811e-09	-2.09269	0.00231904	1.34033	0.00358113
irp2	0.291667	0.291667	0.939891	0.765957	-0.518173	0.859077	3.04143	0.180798	2.41775	0.197912	3.5596	0.11998	2.93592	0.113684	-0.623682	0.912819	1.03066e-14	1	-3.6369	<1.00E-07	-2.07293	0.00143363	-3.6369	<1.00E-07	-2.07293	0.00143363	1.56398	0.00420383
ybtE	0.291667	0.291667	0.983607	0.765957	-1.17917	0.403839	2.9537	0.362261	2.65053	0.245221	4.13287	0.155013	3.82969	0.0643495	-0.303174	0.994465	1.30927e-14	1	-4.98165	<1.00E-07	-2.07293	0.00143363	-4.98165	<1.00E-07	-2.07293	0.00143363	2.90872	0.000101153
ybtP	0.333333	0.291667	0.972678	0.765957	-0.522431	0.862221	5.1672	0.0448756	4.45206	0.0243839	5.68963	0.0368367	4.97449	0.0184284	-0.715143	0.916997	0.194156	0.989557	-4.26549	<1.00E-07	-1.87877	0.00384043	-4.45965	<1.00E-07	-2.07293	0.00143363	2.38672	0.000164234
ybtQ	0.333333	0.291667	0.978142	0.765957	-0.613416	0.799942	5.3341	0.0409979	4.55983	0.0232046	5.94752	0.0305987	5.17325	0.0152953	-0.774271	0.901167	0.194156	0.989557	-4.49424	<1.00E-07	-1.87877	0.00384043	-4.68839	<1.00E-07	-2.07293	0.00143363	2.61547	0.000113328
ybtS	0.333333	0.291667	0.983607	0.765957	-1.48705	0.261625	6.11615	0.0484839	5.0384	0.0345299	7.6032	0.0200679	6.52544	0.00947673	-1.07775	0.843775	0.194156	0.989557	-4.78749	<1.00E-07	-1.87877	0.00384043	-4.98165	<1.00E-07	-2.07293	0.00143363	2.90872	0.000101153
ybtT	0.333333	0.291667	0.989071	0.765957	-2.00506	0.125917	4.33113	0.237645	5.32397	0.0192747	6.33619	0.0587079	7.32903	0.00266985	0.992837	0.948448	0.194156	0.989557	-5.1985	2.39087e-09	-1.87877	0.00384043	-5.39265	6.36313e-10	-2.07293	0.00143363	3.31973	0.000156706
ybtU	0.333333	0.291667	0.983607	0.765957	-1.26734	0.342026	2.562	0.500181	2.51444	0.279679	3.82934	0.216522	3.78178	0.0650654	-0.0475591	0.999984	0.194156	0.989557	-4.78749	<1.00E-07	-1.87877	0.00384043	-4.98165	<1.00E-07	-2.07293	0.00143363	2.90872	0.000101153
ybtX	0.333333	0.291667	0.983607	0.765957	-1.48705	0.261625	6.11615	0.0484839	5.0384	0.0345299	7.6032	0.0200679	6.52544	0.00947673	-1.07775	0.843775	0.194156	0.989557	-4.78749	<1.00E-07	-1.87877	0.00384043	-4.98165	<1.00E-07	-2.07293	0.00143363	2.90872	0.000101153
fuyA	0.333333	0.291667	0.989071	0.765957	-2.00506	0.125917	4.33113	0.237645	5.32397	0.0192747	6.33619	0.0587079	7.32903	0.00266985	0.992837	0.948448	0.194156	0.989557	-5.1985	2.39087e-09	-1.87877	0.00384043	-5.39265	6.36313e-10	-2.07293	0.00143363	3.31973	0.000156706
ecpA	0.75	0.958333	0.994536	1	-1.90991	0.174643	-0.164933	0.999255	-1.34859	0.865434	1.74498	0.687414	0.56132	0.991909	-1.18366	0.933096	-1.50085	0.363332	-3.52155	0.000887054	-3.56785	0.100918	-2.0207	0.302304	-2.067	0.627408	-0.0462998	0.999993
ecpB	0.75	0.958333	0.994536	1	-1.90991	0.174643	-0.164933	0.999255	-1.34859	0.865434	1.74498	0.687414	0.56132	0.991909	-1.18366	0.933096	-1.50085	0.363332	-3.52155	0.000887054	-3.56785	0.100918	-2.0207	0.302304	-2.067	0.627408	-0.0462998	0.999993
ecpC	0.75	0.958333	0.994536	1	-1.90991	0.174643	-0.164933	0.999255	-1.34859	0.865434	1.74498	0.687414	0.56132	0.991909	-1.18366	0.933096	-1.50085	0.363332	-3.52155	0.000887054	-3.56785	0.100918	-2.0207	0.302304	-2.067	0.627408	-0.0462998	0.999993
ecpE	0.75	0.958333	0.994536	1	-1.90991	0.174643	-0.164933	0.999255	-1.34859	0.865434	1.74498	0.687414	0.56132	0.991909	-1.18366	0.933096	-1.50085	0.363332	-3.52155	0.000887054	-3.56785	0.100918	-2.0207	0.302304	-2.067	0.627408	-0.0462998	0.999993
ecpR	0.708333	0.958333	0.994536	1	-2.12789	0.101893	-0.255979	0.997122	-1.42918	0.842908	1.87192	0.631004	0.698719	0.984569	-1.1732	0.93361	-1.71854	0.23607	-3.76125	0.000271931	-3.81988	0.0735795	-2.04271	0.29418	-2.10134	0.623813	-0.0586253	0.999986
fimA	0.583333	0.916667	0.961749	0.978723	-2.08293	0.0732493	-2.47656	0.586543	-4.36746	0.174637	-0.393628	0.997937	-2.28453	0.763477	-1.8909	0.582693	-2.06142	0.0707617	-2.8881	2.00348e-06	-3.49217	0.0076039	-0.826679	0.753815	-1.43075	0.662891	-0.604068	0.944276
fimE	0.625	0.958333	0.967213	1	-2.30236	0.0582573	-0.921893	0.854847	-3.55687	0.20541	1.38047	0.779457	-1.25451	0.925655	-2.63498	0.463767	-2.0982	0.0937396	-2.60736	2.91678e-05	-4.26073	0.0429599	-0.509159	0.945125	-2.16254	0.621041	-1.65338	0.74349
fimF	0.666667	0.958333	0.983607	1	-2.17225	0.085394	-0.61937	0.954766	-2.62664	0.438722	1.55288	0.727734	-0.454391	0.99567	-2.00727	0.690688	-1.91263	0.150902	-3.06184	4.03218e-05	-4.04635	0.0557833	-1.14921	0.647098	-2.13372	0.621805	-0.984508	0.933451
fimG	0.666667	0.958333	0.983607	1	-2.17225	0.085394	-0.61937	0.954766	-2.62664	0.438722	1.55288	0.727734	-0.454391	0.99567	-2.00727	0.690688	-1.91263	0.150902	-3.06184	4.03218e-05	-4.04635	0.0557833	-1.14921	0.647098	-2.13372	0.621805	-0.984508	0.933451
fimH	0.666667	0.958333	0.983607	1	-2.17225	0.085394	-0.61937	0.954766	-2.62664	0.438722	1.55288	0.727734	-0.454391	0.99567	-2.00727	0.690688	-1.91263	0.150902	-3.06184	4.03218e-05	-4.04635	0.0557833	-1.14921	0.647098	-2.13372	0.621805	-0.984508	0.933451
fimI	0.583333	0.958333	0.967213	1	-2.47557	0.0349145	-1.11015	0.774613	-3.76025	0.173558	1.36543	0.78838	-1.28468	0.92313	-2.65011	0.467946	-2.27686	0.0570986	-2.79075	4.59946e-06	-4.46263	0.0334014	-0.513884	0.94396	-2.18576	0.621336	-1.67188	0.744386

## Sheet: Sequence Type
	Proportion of Isolates							Corrected
								Other to 127		Other to 131		Other to 393		Other to 69		Other to 73		Other to 95		127 to 131		127 to 393		127 to 69		127 to 73		127 to 95		131 to 393		131 to 69		131 to 73		131 to 95		393 to 69		393 to 73		393 to 95		69 to 73		69 to 95		73 to 95
Factor	ST127	ST131	ST393	ST69	ST73	ST95	Other	Estimate	p-value	Estimate	p-value	Estimate	p-value	Estimate	p-value	Estimate	p-value	Estimate	p-value	Estimate	p-value	Estimate	p-value	Estimate	p-value	Estimate	p-value	Estimate	p-value	Estimate	p-value	Estimate	p-value	Estimate	p-value	Estimate	p-value	Estimate	p-value	Estimate	p-value	Estimate	p-value	Estimate	p-value	Estimate	p-value	Estimate	p-value
aufA	1	0.0408163	0.0909091	0	1	1	0.439394	-0.569663	0.999915	0.457952	0.999917	0.071295	1	1.84698	0.912953	-0.87981	0.998272	-0.642885	0.999802	1.02762	0.999457	0.640958	0.99994	2.41664	0.953488	-0.310146	1	-0.0732219	1	-0.386657	0.999991	1.38903	0.995307	-1.33776	0.996648	-1.10084	0.999139	1.77568	0.949654	-0.951105	0.999148	-0.71418	0.999869	-2.72679	0.899889	-2.48986	0.941362	0.236925	1
aufB	1	0.0408163	0.0909091	0	1	1	0.44697	-0.609118	0.999863	0.565081	0.999717	-0.00320094	1	1.7149	0.936292	-0.939793	0.997315	-0.730918	0.999518	1.1742	0.998787	0.605917	0.999954	2.32402	0.959647	-0.330675	0.999999	-0.1218	1	-0.568282	0.999918	1.14982	0.998347	-1.50487	0.993363	-1.296	0.997672	1.7181	0.957806	-0.936592	0.99918	-0.727717	0.999837	-2.65469	0.907551	-2.44582	0.941977	0.208875	1
aufD	1	0.0408163	0.0909091	0	1	1	0.44697	-0.609118	0.999863	0.565081	0.999717	-0.00320094	1	1.7149	0.936292	-0.939793	0.997315	-0.730918	0.999518	1.1742	0.998787	0.605917	0.999954	2.32402	0.959647	-0.330675	0.999999	-0.1218	1	-0.568282	0.999918	1.14982	0.998347	-1.50487	0.993363	-1.296	0.997672	1.7181	0.957806	-0.936592	0.99918	-0.727717	0.999837	-2.65469	0.907551	-2.44582	0.941977	0.208875	1
aufE	1	0.0408163	0.0909091	0	1	1	0.44697	-0.609118	0.999863	0.565081	0.999717	-0.00320094	1	1.7149	0.936292	-0.939793	0.997315	-0.730918	0.999518	1.1742	0.998787	0.605917	0.999954	2.32402	0.959647	-0.330675	0.999999	-0.1218	1	-0.568282	0.999918	1.14982	0.998347	-1.50487	0.993363	-1.296	0.997672	1.7181	0.957806	-0.936592	0.99918	-0.727717	0.999837	-2.65469	0.907551	-2.44582	0.941977	0.208875	1
ecpD	1	1	1	1	1	1	0.931818	-0.345787	0.999998	-0.811236	0.999598	-0.201121	1	-0.187066	1	-0.431559	0.999988	-0.321249	0.999998	-0.465449	0.999998	0.144666	1	0.15872	1	-0.0857727	1	0.0245378	1	0.610115	0.999992	0.624169	0.999992	0.379676	0.999999	0.489987	0.999997	0.0140543	1	-0.230439	1	-0.120128	1	-0.244493	1	-0.134182	1	0.110311	1
focA	0	0	0.0909091	0	0.76	0.290323	0.0909091	2.95168	0.459325	0.426775	0.999991	-2.49926	0.72263	0.261867	1	-2.32304	0.00229749	-0.307206	0.99893	-2.52491	0.95402	-5.45094	0.196818	-2.68982	0.943497	-5.27473	0.013097	-3.25889	0.355142	-2.92603	0.909412	-0.164908	1	-2.74982	0.834486	-0.733981	0.999859	2.76112	0.924025	0.176216	1	2.19205	0.844091	-2.58491	0.894457	-0.569072	0.999971	2.01584	0.0304149
focC	0	0	0	0	0.64	0	0.0378788	2.13539	0.792013	1.05493	0.99801	-0.0117987	1	-0.0182042	1	-2.43603	0.00711071	2.23158	0.769337	-1.08046	0.999469	-2.14719	0.990133	-2.15359	0.990022	-4.57142	0.0416204	0.0961878	1	-1.06673	0.999877	-1.07313	0.999873	-3.49096	0.595524	1.17665	0.999156	-0.00640549	1	-2.42423	0.965927	2.24337	0.987801	-2.41783	0.96655	2.24978	0.987678	4.66761	0.0372642
focD	0.75	0	0.0909091	0	0.8	0.290323	0.151515	-0.229548	0.999885	-0.0138667	1	-2.92594	0.583097	0.232028	1	-1.2101	0.390603	1.50031	0.17112	0.215682	1	-2.69639	0.779938	0.461576	0.999993	-0.980551	0.866454	1.72986	0.193775	-2.91207	0.953809	0.245894	1	-1.19623	0.999022	1.51418	0.996421	3.15796	0.877252	1.71584	0.964176	4.42625	0.134898	-1.44213	0.994571	1.26829	0.9972	2.71041	0.00186693
hek	1	0.0612245	0.181818	0	0.8	0.290323	0.181818	-4.37415	0.116989	-0.554475	0.999581	-1.27883	0.906681	1.11955	0.993625	-1.92963	0.0151552	0.305746	0.99784	3.81967	0.577666	3.09532	0.72277	5.4937	0.225541	2.44452	0.783474	4.6799	0.0809667	-0.724355	0.999526	1.67403	0.985833	-1.37516	0.965194	0.860222	0.99769	2.39838	0.820138	-0.6508	0.998679	1.58458	0.834018	-3.04918	0.59017	-0.813806	0.999135	2.23538	0.00783104
papA	0	0.102041	1	0.357143	0.56	0.0322581	0.151515	2.82144	0.49844	0.422037	0.999903	-3.16403	0.442866	1.44444	0.761709	-1.1083	0.362226	3.00178	0.0227791	-2.3994	0.901478	-5.98546	0.100539	-1.377	0.988835	-3.92973	0.13714	0.18034	1	-3.58607	0.592584	1.0224	0.996344	-1.53033	0.933077	2.57974	0.717395	4.60847	0.0765447	2.05573	0.896464	6.1658	0.0147743	-2.55274	0.28706	1.55734	0.890961	4.11007	0.000302807
papC	0.875	0.122449	1	0.357143	0.64	0.935484	0.234848	-1.54543	0.369744	-1.10265	0.975588	-3.78212	0.256981	0.688988	0.987513	-0.43556	0.978856	-1.72788	0.227551	0.44278	0.999954	-2.2367	0.888501	2.23441	0.497178	1.10987	0.800121	-0.182453	0.999996	-2.67948	0.855088	1.79163	0.913868	0.667087	0.999042	-0.625233	0.999653	4.47111	0.109237	3.34656	0.474045	2.05424	0.916797	-1.12455	0.937036	-2.41687	0.313689	-1.29232	0.644611
papD	0.875	0.163265	1	0.357143	0.8	0.935484	0.257576	-1.50637	0.398808	-1.06749	0.975835	-3.84767	0.23955	0.552843	0.995738	-1.15594	0.381265	-1.79106	0.18392	0.438884	0.99995	-2.3413	0.865161	2.05922	0.581454	0.350439	0.999563	-0.284687	0.99994	-2.78018	0.824691	1.62033	0.937528	-0.0884452	1	-0.723571	0.999074	4.40052	0.122731	2.69174	0.733221	2.05661	0.916877	-1.70878	0.678128	-2.34391	0.339475	-0.635126	0.987066
papE	0.9375	0.142857	1	0.714286	0.8	0.935484	0.242424	-2.13658	0.204454	-0.896698	0.990751	-3.52256	0.319413	-0.482333	0.998137	-1.15492	0.387869	-1.67105	0.264883	1.23988	0.98703	-1.38598	0.990234	1.65425	0.857364	0.981664	0.950975	0.465535	0.999492	-2.62586	0.855603	0.414365	0.999969	-0.258219	0.999996	-0.774348	0.998709	3.04023	0.530092	2.36764	0.823084	1.85151	0.944605	-0.672584	0.995962	-1.18871	0.937095	-0.51613	0.995827
papF	0.9375	0.183673	1	0.714286	0.72	0.935484	0.212121	-2.55619	0.0696716	-0.435299	0.999812	-3.32387	0.377731	-0.301135	0.999881	-1.06857	0.409999	-2.00119	0.102043	2.1209	0.823596	-0.767677	0.999629	2.25506	0.588612	1.48762	0.705523	0.555008	0.998661	-2.88857	0.776476	0.134164	1	-0.633274	0.999109	-1.56589	0.939783	3.02274	0.526209	2.2553	0.844687	1.32269	0.989343	-0.767438	0.991308	-1.70005	0.732027	-0.932613	0.904427
papG	0	0.183673	1	0.357143	0.56	0.645161	0.128788	2.28167	0.720492	-0.835961	0.994787	-2.00127	0.854876	3.01806	0.0739422	-1.64117	0.0525724	-0.88232	0.756799	-3.11763	0.702314	-4.28294	0.424399	0.736386	0.999706	-3.92284	0.126262	-3.16399	0.365765	-1.16531	0.997404	3.85402	0.283156	-0.805205	0.997361	-0.0463594	1	5.01932	0.035006	0.360102	0.999992	1.11895	0.993416	-4.65922	0.00458279	-3.90038	0.0107195	0.758846	0.871304
papH	0.9375	0.183673	1	0.357143	0.8	0.935484	0.25	-2.12763	0.207344	-1.00832	0.981231	-3.74379	0.263863	0.674338	0.988195	-1.14657	0.393991	-1.73966	0.216134	1.11931	0.991949	-1.61616	0.979382	2.80197	0.303683	0.981058	0.951006	0.387967	0.999822	-2.73547	0.831614	1.68266	0.925258	-0.138252	1	-0.731343	0.998985	4.41812	0.115784	2.59721	0.760856	2.00412	0.924327	-1.82091	0.616507	-2.414	0.308697	-0.593091	0.991053
papJ	0.9375	0.163265	1	0.357143	0.76	0.935484	0.234848	-2.20002	0.176207	-1.04603	0.979046	-3.64457	0.289352	0.814035	0.97084	-0.996062	0.527629	-1.74228	0.219188	1.15398	0.991035	-1.44455	0.988306	3.01405	0.228512	1.20396	0.870331	0.457743	0.999541	-2.59853	0.864679	1.86007	0.891388	0.049972	1	-0.696242	0.999286	4.4586	0.105966	2.64851	0.736274	1.90229	0.939316	-1.8101	0.622448	-2.55631	0.248595	-0.746214	0.968071
papK	0.9375	0.163265	1	0.357143	0.76	0.935484	0.25	-2.08272	0.229815	-1.19182	0.960282	-3.78405	0.254774	0.649494	0.990313	-0.909244	0.632891	-1.70277	0.239726	0.890906	0.99785	-1.70133	0.97353	2.73222	0.334041	1.17348	0.883028	0.379952	0.999842	-2.59224	0.868907	1.84131	0.894356	0.282574	0.999993	-0.510954	0.999882	4.43355	0.114839	2.87481	0.660818	2.08128	0.911306	-1.55874	0.7625	-2.35227	0.340521	-0.793528	0.956494
papX	0.6875	0.877551	1	0.714286	0.76	0.967742	0.378788	-0.229766	0.999788	-3.06936	0.328402	-2.14424	0.796017	0.79192	0.970739	-0.583099	0.93636	-1.92423	0.312471	-2.83959	0.616749	-1.91447	0.909763	1.02169	0.966222	-0.353333	0.998712	-1.69446	0.592561	0.925117	0.999408	3.86128	0.260054	2.48626	0.695453	1.14513	0.995383	2.93616	0.515717	1.56114	0.962157	0.220009	1	-1.37502	0.844457	-2.71615	0.271477	-1.34113	0.791469
prfG	0.9375	0.0204082	0.0909091	0	0.4	0.290323	0.0984848	-3.20194	0.0115289	0.491445	0.999892	-2.4661	0.731924	0.243103	1	-0.540761	0.955344	-0.191419	0.999905	3.69338	0.397568	0.735836	0.999754	3.44504	0.744644	2.66118	0.0755795	3.01052	0.0304189	-2.95755	0.82094	-0.248342	1	-1.03221	0.995099	-0.682864	0.999642	2.7092	0.933258	1.92534	0.928132	2.27468	0.8129	-0.783863	0.999822	-0.434522	0.999994	0.349342	0.997321
sfaB	0.8125	0.0204082	0.0909091	0	0.76	0.290323	0.166667	-0.954196	0.810005	-0.614298	0.999621	-3.07784	0.537393	0.152617	1	-1.02513	0.516195	0.930551	0.644252	0.339898	0.999995	-2.12364	0.920735	1.10681	0.9991	-0.0709385	1	1.88475	0.146539	-2.46354	0.92677	0.766915	0.999953	-0.410836	0.999977	1.54485	0.969759	3.23045	0.89108	2.0527	0.920161	4.00839	0.225035	-1.17775	0.998589	0.777933	0.999866	1.95568	0.0351051
sfaD	0.8125	0	0.0909091	0	0.76	0.290323	0.166667	-0.743671	0.940508	0.233454	1	-2.93097	0.573927	0.196204	1	-0.974344	0.592785	1.1959	0.383783	0.977126	0.999445	-2.1873	0.904576	0.939875	0.999599	-0.230673	0.999942	1.93957	0.126064	-3.16442	0.895067	-0.0372502	1	-1.2078	0.997788	0.962442	0.999447	3.12717	0.89119	1.95662	0.930479	4.12687	0.185598	-1.17055	0.99843	0.999692	0.999337	2.17024	0.0155942
sfaG	0.8125	0	0.0909091	0	0.16	0.290323	0.121212	-1.39497	0.425547	0.649394	0.999869	-2.38944	0.753664	0.299833	0.999999	1.25805	0.393798	0.752884	0.860755	2.04436	0.956637	-0.994475	0.998095	1.6948	0.986513	2.65301	0.0145198	2.14785	0.0615395	-3.03884	0.880496	-0.349561	1	0.608651	0.999936	0.10349	1	2.68928	0.925525	3.64749	0.380283	3.14233	0.483299	0.958212	0.999384	0.453051	0.999992	-0.505161	0.99049
sfaH	0.8125	0	0.0909091	0	0.24	0.290323	0.0681818	-2.65014	0.00743192	0.968678	0.998567	-1.78995	0.896179	0.456659	0.999985	-0.342429	0.997899	-0.545977	0.977524	3.61881	0.580204	0.860189	0.998873	3.1068	0.74376	2.30771	0.0393366	2.10416	0.0716768	-2.75863	0.905617	-0.512019	0.999996	-1.31111	0.994375	-1.51465	0.989442	2.24661	0.95261	1.44752	0.976307	1.24397	0.985377	-0.799089	0.999704	-1.00264	0.9988	-0.203547	0.999919
sfaS	0.8125	0	0.0909091	0	0	0.290323	0.0454545	-3.54091	0.00042387	0.997552	0.998424	-1.28542	0.971602	0.684289	0.99977	1.98309	0.836114	-1.32488	0.532756	4.53846	0.327227	2.25549	0.836755	4.2252	0.351551	5.524	0.00838282	2.21603	0.0510816	-2.28297	0.957454	-0.313263	1	0.985536	0.999635	-2.32243	0.922331	1.96971	0.962577	3.26851	0.697331	-0.0394589	1	1.2988	0.997994	-2.00916	0.942411	-3.30796	0.310344
tosA	0	0	0	0	0.48	0	0.0530303	2.25726	0.741363	0.797652	0.999584	0.165397	1	0.178335	1	-1.65459	0.114322	2.708	0.565864	-1.45961	0.997023	-2.09186	0.986112	-2.07892	0.986291	-3.91184	0.129269	0.45074	0.999991	-0.632254	0.999991	-0.619316	0.999992	-2.45224	0.885559	1.91035	0.98762	0.0129381	1	-1.81998	0.985041	2.5426	0.962434	-1.83292	0.984077	2.52966	0.962389	4.36258	0.0660299
sat	0	0.959184	1	0.714286	0.56	0.0322581	0.143939	1.82553	0.88223	-0.284201	0.999993	-1.69324	0.930037	1.5794	0.7427	-1.78995	0.0372384	2.59737	0.10563	-2.10973	0.950107	-3.51876	0.662606	-0.24613	1	-3.61548	0.204498	0.771848	0.999354	-1.40903	0.993547	1.8636	0.939881	-1.50575	0.95811	2.88158	0.665066	3.27263	0.436007	-0.0967131	1	4.29061	0.205673	-3.36935	0.10233	1.01798	0.988719	4.38732	0.000145737
vat	0	0	0	0	0	0.645161	0.030303	1.67008	0.929352	0.362048	0.999998	0.749384	0.999682	1.56667	0.986577	2.05859	0.816088	-1.46192	0.535177	-1.30804	0.998773	-0.920701	0.999776	-0.103414	1	0.388504	0.999996	-3.13201	0.432443	0.387336	0.999999	1.20462	0.999604	1.69654	0.994174	-1.82397	0.984181	0.817287	0.999873	1.3092	0.998246	-2.2113	0.933376	0.491918	0.999996	-3.02859	0.785731	-3.52051	0.263384
kpsF	1	0.979592	0.909091	0.857143	1	1	0.530303	-1.81463	0.886956	-0.190962	1	0.824044	0.992503	1.78061	0.679044	-1.9711	0.835441	-1.42751	0.965049	1.62367	0.988808	2.63867	0.80951	3.59524	0.459526	-0.156474	1	0.387117	0.999996	1.01501	0.998138	1.97158	0.940233	-1.78014	0.980134	-1.23655	0.997514	0.95657	0.990611	-2.79515	0.758207	-2.25156	0.897986	-3.75172	0.397292	-3.20813	0.587111	0.54359	0.999973
kpsS	1	0.959184	0.909091	1	0.92	1	0.583333	-1.42346	0.966507	0.294969	0.999994	1.66558	0.879644	-0.402902	0.999993	0.369985	0.999461	-1.05291	0.994256	1.71843	0.984302	3.08904	0.735512	1.02056	0.999597	1.79344	0.931525	0.370544	0.999998	1.37061	0.992202	-0.69787	0.999951	0.0750164	1	-1.34788	0.996081	-2.06848	0.968853	-1.2956	0.983967	-2.7185	0.838181	0.772887	0.999803	-0.650011	0.999973	-1.4229	0.981431
ibeA	0	0.0204082	0.0909091	0	0	0.322581	0.265152	4.23011	0.131208	3.97727	0.208586	-1.05779	0.983081	0.669468	0.999777	4.76725	0.0688654	0.922876	0.598674	-0.252842	1	-5.2879	0.158181	-3.56065	0.764877	0.53714	0.999987	-3.30724	0.420631	-5.03506	0.198633	-3.3078	0.828673	0.789982	0.999899	-3.0544	0.663118	1.72726	0.979335	5.82504	0.0933304	1.98066	0.773038	4.09779	0.637401	0.253408	0.999999	-3.84438	0.271144
traJ	0.125	0.265306	0.363636	0.142857	0.16	0.322581	0.227273	-0.973121	0.957257	1.53688	0.992859	1.16898	0.874347	2.54519	0.24989	-1.04008	0.836253	-1.98978	0.115126	2.51	0.964773	2.1421	0.744547	3.51831	0.250149	-0.0669616	1	-1.01666	0.900672	-0.367898	0.999999	1.00831	0.999689	-2.57696	0.940323	-3.52665	0.8184	1.37621	0.816245	-2.20906	0.594191	-3.15876	0.125031	-3.58528	0.142983	-4.53497	0.0116797	-0.949694	0.824424
chuY	0.9375	1	1	1	1	1	0.613636	2.04463	0.787287	-0.539325	0.999967	-0.044446	1	-0.0383174	1	-0.354518	0.999997	-0.0860815	1	-2.58395	0.938388	-2.08907	0.98894	-2.08294	0.989155	-2.39915	0.943092	-2.13071	0.983366	0.494879	0.999999	0.501008	0.999998	0.184807	1	0.453243	0.999999	0.00612863	1	-0.310072	1	-0.0416355	1	-0.316201	1	-0.0477641	1	0.268437	1
iroB	0.8125	0	0	0	0.8	0.483871	0.318182	-0.665977	0.961355	2.34407	0.863992	0.127259	1	0.108401	1	-0.909446	0.686615	0.0484922	1	3.01004	0.761524	0.793236	0.999881	0.774378	0.999903	-0.24347	0.999924	0.714469	0.957558	-2.21681	0.988025	-2.23567	0.988053	-3.25351	0.634795	-2.29557	0.912972	-0.018858	1	-1.03671	0.999385	-0.078767	1	-1.01785	0.999482	-0.059909	1	0.957938	0.743409
iroE	0.8125	0	0.0909091	0	0.8	0.483871	0.310606	-0.600884	0.97729	2.40581	0.853829	-4.51387	0.18453	0.027981	1	-0.866393	0.739588	-0.0524163	1	3.0067	0.769043	-3.91299	0.473823	0.628865	0.99998	-0.265509	0.999876	0.548467	0.989451	-6.91968	0.108385	-2.37783	0.986767	-3.2722	0.636413	-2.45823	0.886957	4.54185	0.740178	3.64748	0.520925	4.46146	0.186687	-0.894374	0.999827	-0.0803974	1	0.813976	0.868548
iroN	0.8125	0	0.0909091	0	0.8	0.483871	0.318182	-0.738704	0.935095	2.42826	0.843923	-2.35724	0.693692	0.242705	1	-0.954647	0.628012	0.103872	0.999995	3.16696	0.715425	-1.61853	0.962456	0.981409	0.9994	-0.215943	0.999962	0.842577	0.902702	-4.78549	0.392283	-2.18555	0.98637	-3.3829	0.591637	-2.32438	0.908312	2.59994	0.940394	1.40259	0.977814	2.46111	0.674043	-1.19735	0.997953	-0.138833	1	1.05852	0.625991
fliCH7	0	0	0.0909091	0	0	0.806452	0.106061	4.06025	0.170749	-0.0764021	1	-0.807835	0.996172	1.3089	0.986536	3.73518	0.2141	-1.1448	0.58346	-4.13666	0.808372	-4.86809	0.254356	-2.75136	0.906923	-0.325078	0.999999	-5.20505	0.0296661	-0.731433	0.999974	1.3853	0.999266	3.81158	0.854595	-1.0684	0.999604	2.11673	0.912982	4.54301	0.300867	-0.336965	0.999986	2.42628	0.942707	-2.4537	0.803046	-4.87998	0.0434773
iss	1	0.918367	0.909091	1	1	1	0.606061	-2.50036	0.629024	0.425518	0.999897	-1.6522	0.656877	-3.45144	0.346532	-2.80253	0.49713	-3.01486	0.421936	2.92588	0.774302	0.848157	0.999221	-0.951079	0.999532	-0.302168	0.999999	-0.514505	0.999981	-2.07772	0.858565	-3.87696	0.514356	-3.22805	0.666563	-3.44038	0.625093	-1.79924	0.949427	-1.15032	0.995718	-1.36266	0.989261	0.648911	0.99995	0.436574	0.999995	-0.212337	1
neuC	0	0.0204082	0.181818	0	0	1	0.234848	3.89734	0.186485	0.994551	0.993424	0.589149	0.995857	3.20649	0.450378	4.28376	0.118244	-4.17637	0.144698	-2.90279	0.851661	-3.30819	0.573413	-0.69085	0.999943	0.386425	0.999998	-8.07371	0.00640804	-0.405402	0.999985	2.21194	0.953611	3.28921	0.750726	-5.17093	0.247226	2.61734	0.710168	3.69462	0.446756	-4.76552	0.146137	1.07727	0.99927	-7.38286	0.0238421	-8.46014	0.00391923
cnf1	1	0.102041	0.0909091	0	0.84	0.290323	0.128788	-3.76277	0.218757	-1.64311	0.900061	-3.77635	0.406309	0.0770655	1	-1.69068	0.0852998	0.700871	0.886038	2.11967	0.958696	-0.0135742	1	3.83984	0.821705	2.07209	0.873708	4.46364	0.0917012	-2.13324	0.968583	1.72017	0.995583	-0.047577	1	2.34398	0.7568	3.85341	0.840152	2.08566	0.947115	4.47722	0.209784	-1.76775	0.990303	0.623805	0.999973	2.39155	0.00898739
kpsM	1	0.734694	0.909091	0.428571	0.92	1	0.5	-1.92723	0.850415	0.620426	0.998674	0.0325069	1	3.11665	0.0221392	-0.283159	0.999807	-1.67754	0.918814	2.54766	0.84809	1.95974	0.937185	5.04389	0.0681572	1.64408	0.948024	0.249697	1	-0.587919	0.999801	2.49623	0.677433	-0.903585	0.99607	-2.29796	0.901731	3.08415	0.0781028	-0.315666	0.999985	-1.71004	0.965465	-3.39981	0.0926572	-4.79419	0.0854816	-1.39438	0.977198
focH	0.0625	0	0	0	0.8	0	0.106061	2.57459	0.0970451	0.0648908	1	0.00410028	1	0.00229938	1	-1.7432	0.0672256	4.27588	0.132329	-2.5097	0.949317	-2.57049	0.958912	-2.57229	0.958312	-4.31779	0.000381801	1.7013	0.968074	-0.0607905	1	-0.0625914	1	-1.80809	0.986964	4.21099	0.74389	-0.00180089	1	-1.7473	0.993076	4.27178	0.776907	-1.7455	0.993023	4.27359	0.774865	6.01909	0.00719497
iha	0	0.938776	1	0.714286	0.68	0	0.181818	2.19304	0.754899	-1.17568	0.974961	-2.10836	0.81265	0.830452	0.970675	-2.05982	0.00527885	3.77461	0.215745	-3.36872	0.652657	-4.3014	0.406838	-1.36259	0.987163	-4.25286	0.0736416	1.58157	0.989974	-0.932678	0.99927	2.00613	0.885107	-0.884137	0.997069	4.95029	0.239526	2.93881	0.525905	0.048541	1	5.88297	0.105714	-2.89027	0.123876	2.94416	0.667347	5.83443	0.00593834
sfaA	0.8125	0	0	0	0	0	0.0833333	-1.15712	0.743176	1.597	0.986906	-0.0225858	1	-0.0287715	1	4.62746	0.0949517	5.14027	0.0640949	2.75412	0.879524	1.13454	0.999496	1.12835	0.999512	5.78458	0.016728	6.2974	0.0109082	-1.61958	0.998848	-1.62577	0.998823	3.03046	0.911997	3.54328	0.852358	-0.00618569	1	4.65005	0.722821	5.16286	0.631795	4.65623	0.721589	5.16904	0.630502	0.512813	0.999992
tsh	1	0.0204082	0.0909091	0	0.96	0.290323	0.409091	-1.55914	0.946034	8.11252	0.0077463	-0.782204	0.996476	0.806427	0.999274	-0.379171	0.999683	3.53353	4.71474e-06	9.67165	0.0116196	0.776932	0.999735	2.36556	0.94938	1.17996	0.993243	5.09267	0.0178021	-8.89472	0.0124695	-7.30609	0.157791	-8.49169	0.0134812	-4.57898	0.551376	1.58863	0.98398	0.403033	0.999981	4.31574	0.0378481	-1.1856	0.997049	2.72711	0.759609	3.9127	0.00144614
ireA	0	0	0	0	0.52	0.645161	0.0909091	2.87321	0.491199	0.123857	1	0.980344	0.997221	1.28315	0.987741	-1.3911	0.17809	-1.46514	0.2074	-2.74936	0.948426	-1.89287	0.981871	-1.59006	0.992668	-4.26432	0.082722	-4.33835	0.0727495	0.856487	0.999926	1.1593	0.999572	-1.51496	0.994153	-1.58899	0.993024	0.302809	0.999999	-2.37145	0.838016	-2.44548	0.808824	-2.67426	0.743135	-2.74829	0.695184	-0.0740329	1
iucA	0	0.938776	0.909091	0.714286	0.56	0.16129	0.272727	2.05462	0.805945	-0.829143	0.994992	-1.17445	0.898858	0.0562397	1	-1.74921	0.0210974	0.135952	0.999991	-2.88376	0.780881	-3.22907	0.545447	-1.99838	0.905786	-3.80383	0.150108	-1.91867	0.872978	-0.345303	0.999991	0.885383	0.997509	-0.920064	0.995364	0.965095	0.995689	1.23069	0.900618	-0.574761	0.998881	1.3104	0.918697	-1.80545	0.574702	0.0797119	1	1.88516	0.0436378
iucB	0	0.938776	0.909091	0.714286	0.56	0.193548	0.272727	2.07366	0.799028	-0.885389	0.992913	-1.18973	0.892946	0.041149	1	-1.73247	0.0228093	-0.0539496	1	-2.95905	0.759851	-3.26339	0.532316	-2.03251	0.898483	-3.80614	0.149566	-2.12761	0.803535	-0.304341	0.999996	0.926538	0.996814	-0.847085	0.997073	0.83144	0.998079	1.23088	0.900339	-0.542744	0.99919	1.13578	0.95638	-1.77362	0.594549	-0.0950986	1	1.67852	0.0842241
iucC	0	0.938776	0.909091	0.714286	0.56	0.193548	0.272727	2.07366	0.799028	-0.885389	0.992913	-1.18973	0.892946	0.041149	1	-1.73247	0.0228093	-0.0539496	1	-2.95905	0.759851	-3.26339	0.532316	-2.03251	0.898483	-3.80614	0.149566	-2.12761	0.803535	-0.304341	0.999996	0.926538	0.996814	-0.847085	0.997073	0.83144	0.998079	1.23088	0.900339	-0.542744	0.99919	1.13578	0.95638	-1.77362	0.594549	-0.0950986	1	1.67852	0.0842241
iucD	0	0.938776	0.909091	0.785714	0.56	0.225806	0.295455	2.1064	0.786775	-0.285947	0.999988	-1.20424	0.887274	-0.369593	0.999513	-1.66197	0.03205	-0.235382	0.999664	-2.39235	0.892692	-3.31064	0.514306	-2.47599	0.780179	-3.76837	0.158557	-2.34178	0.718062	-0.918295	0.997227	-0.0836459	1	-1.37602	0.958557	0.0505652	1	0.834649	0.986433	-0.457726	0.999693	0.96886	0.97941	-1.29238	0.877186	0.134211	1	1.42659	0.195613
iutA	0	0.918367	0.909091	0.785714	0.52	0.193548	0.272727	2.12466	0.779811	-0.976991	0.986935	-1.22645	0.878416	-0.332442	0.999738	-1.54281	0.0602476	-0.00823275	1	-3.10165	0.708793	-3.35111	0.499167	-2.4571	0.786782	-3.66746	0.183552	-2.13289	0.80154	-0.249459	0.999999	0.644548	0.99959	-0.565815	0.999671	0.968758	0.995066	0.894008	0.980567	-0.316356	0.999965	1.21822	0.938607	-1.21036	0.907726	0.324209	0.999918	1.53457	0.147996
sitB	0	0.0408163	1	0	0	0.129032	0.325758	1.2078	0.987008	-0.851574	0.99753	-2.0436	0.838629	5.82076	0.041312	1.42387	0.965831	-0.854432	0.927597	-2.05937	0.964546	-3.2514	0.757572	4.61296	0.514107	0.216077	1	-2.06223	0.866328	-1.19203	0.997849	6.67233	0.0955676	2.27545	0.934442	-0.00285777	1	7.86436	0.0134599	3.46747	0.683823	1.18917	0.993199	-4.39689	0.561406	-6.67519	0.0225174	-2.27831	0.783035
tcpC	0.9375	0.0204082	0	0	0.72	0.451613	0.106061	-2.83024	0.0361043	0.0513771	1	0.732819	0.999613	0.937456	0.998364	-1.45207	0.123883	0.0796352	0.999999	2.88161	0.696562	3.56306	0.572777	3.76769	0.501086	1.37817	0.781687	2.90987	0.0383489	0.681441	0.999947	0.886079	0.99976	-1.50345	0.966243	0.0282581	1	0.204638	1	-2.18489	0.907388	-0.653183	0.999844	-2.38953	0.862543	-0.857821	0.999187	1.5317	0.152653
usp	1	1	0.0909091	0	0.96	1	0.431818	-0.964501	0.996871	-0.96914	0.998636	0.503801	0.999484	2.22573	0.839176	0.406133	0.999748	-0.886218	0.998245	-0.00463874	1	1.4683	0.990424	3.19023	0.818974	1.37063	0.989947	0.0782829	1	1.47294	0.994027	3.19487	0.867229	1.37527	0.995559	0.0829217	1	1.72193	0.956266	-0.0976679	1	-1.39002	0.992675	-1.81959	0.970221	-3.11195	0.831945	-1.29235	0.993098
clbB	1	0	0	0	1	1	0.181818	-1.37484	0.975918	8.11642	0.0792161	-0.0237813	1	-0.0302668	1	-1.2918	0.984224	-1.29792	0.984637	9.49125	0.0582434	1.35106	0.999312	1.34457	0.999331	0.0830343	1	0.0769182	1	-8.1402	0.341915	-8.14668	0.341073	-9.40822	0.0553763	-9.41434	0.0615022	-0.00648547	1	-1.26802	0.999538	-1.27414	0.999533	-1.26154	0.999552	-1.26765	0.999546	-0.00611615	1
clbN	1	0	0	0	1	1	0.181818	-1.37484	0.975918	8.11642	0.0792161	-0.0237813	1	-0.0302668	1	-1.2918	0.984224	-1.29792	0.984637	9.49125	0.0582434	1.35106	0.999312	1.34457	0.999331	0.0830343	1	0.0769182	1	-8.1402	0.341915	-8.14668	0.341073	-9.40822	0.0553763	-9.41434	0.0615022	-0.00648547	1	-1.26802	0.999538	-1.27414	0.999533	-1.26154	0.999552	-1.26765	0.999546	-0.00611615	1
afaB	0	0.102041	0	0	0	0	0.0606061	1.4008	0.969838	-1.24595	0.979217	3.242	0.479426	4.39991	0.26224	1.81195	0.887868	2.80448	0.540692	-2.64675	0.879076	1.8412	0.985553	2.99911	0.895806	0.41115	0.999995	1.40368	0.994352	4.48796	0.415058	5.64586	0.251892	3.0579	0.757074	4.05043	0.503011	1.15791	0.998765	-1.43005	0.995985	-0.437523	0.999996	-2.58796	0.943078	-1.59543	0.994871	0.99253	0.999114
draC	0	0.102041	0	0	0	0	0.0681818	1.57458	0.943339	-1.14747	0.985202	3.14126	0.503426	4.21844	0.283353	1.99681	0.829305	2.97748	0.468677	-2.72206	0.857242	1.56668	0.993418	2.64386	0.93491	0.422227	0.999994	1.40289	0.994251	4.28874	0.452515	5.36592	0.282794	3.14429	0.724472	4.12495	0.473527	1.07718	0.999126	-1.14445	0.998781	-0.163785	1	-2.22163	0.970384	-1.24096	0.99865	0.980667	0.999179
draD	0	0.102041	0	0	0	0	0.0606061	1.4008	0.969838	-1.24595	0.979217	3.242	0.479426	4.39991	0.26224	1.81195	0.887868	2.80448	0.540692	-2.64675	0.879076	1.8412	0.985553	2.99911	0.895806	0.41115	0.999995	1.40368	0.994352	4.48796	0.415058	5.64586	0.251892	3.0579	0.757074	4.05043	0.503011	1.15791	0.998765	-1.43005	0.995985	-0.437523	0.999996	-2.58796	0.943078	-1.59543	0.994871	0.99253	0.999114
focF	0	0	0	0	0.64	0	0.030303	2.33413	0.734884	-0.0920272	1	0.0182111	1	0.0364236	1	-2.91403	0.00162759	2.55324	0.656473	-2.42615	0.982065	-2.31592	0.984195	-2.2977	0.983775	-5.24815	0.0125023	0.219115	1	0.110238	1	0.128451	1	-2.822	0.93214	2.64527	0.972614	0.0182125	1	-2.93224	0.908235	2.53503	0.974985	-2.95045	0.898417	2.51682	0.974029	5.46727	0.00798575
focG	0	0.0204082	0	0	0.8	0	0.0454545	2.11686	0.796451	-0.789557	0.999109	0.0214154	1	0.013869	1	-3.30596	7.28472e-05	2.23826	0.758859	-2.90642	0.862735	-2.09545	0.990335	-2.10299	0.990255	-5.42282	0.00771859	0.121401	1	0.810973	0.999963	0.803426	0.999965	-2.5164	0.793563	3.02782	0.838199	-0.00754646	1	-3.32737	0.842328	2.21685	0.986993	-3.31983	0.845401	2.22439	0.986901	5.54422	0.00603525
papB	0.9375	0.938776	1	0.714286	0.88	0.935484	0.340909	-2.20848	0.174502	-2.61992	0.514011	-2.14089	0.79721	0.761038	0.976321	-1.61514	0.15501	-1.67067	0.262323	-0.41144	0.999987	0.0675925	1	2.96952	0.227567	0.593336	0.997279	0.537815	0.998821	0.479032	0.999987	3.38096	0.410446	1.00478	0.995848	0.949254	0.997845	2.90193	0.53105	0.525744	0.99992	0.470222	0.999961	-2.37618	0.321065	-2.4317	0.295325	-0.0555213	1
papI	0.6875	0.897959	1	0.714286	0.36	0.870968	0.295455	-1.02406	0.634803	-2.05736	0.698962	-1.7904	0.902693	1.24537	0.809927	0.408287	0.984926	-1.30869	0.348377	-1.03329	0.994033	-0.76634	0.999263	2.26943	0.394038	1.43235	0.318743	-0.284623	0.99974	0.266955	1	3.30273	0.38723	2.46564	0.595667	0.748672	0.999025	3.03577	0.486771	2.19869	0.821454	0.481716	0.999946	-0.837084	0.985575	-2.55406	0.183453	-1.71697	0.132392
sfaC	0.4375	0	0	0	0.32	0.225806	0.151515	0.524851	0.979866	0.657144	0.999852	0.200852	1	0.227339	1	0.719382	0.835325	1.34052	0.278832	0.132292	1	-0.323999	0.999999	-0.297513	0.999999	0.194531	0.999945	0.815671	0.898502	-0.456291	0.999999	-0.429805	0.999999	0.0622386	1	0.683379	0.999882	0.0264861	1	0.51853	0.999986	1.13967	0.998617	0.492044	0.999989	1.11318	0.99869	0.62114	0.960797
agn43	0.625	0.836735	0.545455	0.714286	0.88	0.225806	0.401515	-1.03052	0.693373	-0.560574	0.999897	1.02898	0.920351	0.487878	0.998897	-2.37471	0.0134185	1.07891	0.532713	0.469943	0.999985	2.0595	0.575846	1.51839	0.87407	-1.3442	0.646009	2.10943	0.033996	1.58956	0.981521	1.04845	0.998571	-1.81414	0.964102	1.63949	0.981161	-0.541104	0.995893	-3.4037	0.0654675	0.0499301	1	-2.86259	0.241915	0.591034	0.99832	3.45363	0.000142865
pic	0.125	0	0	0	1	0	0.106061	1.57385	0.433278	0.537606	0.999964	-0.002183	1	-0.00750633	1	-5.20223	0.0511564	3.64055	0.250399	-1.03624	0.999116	-1.57603	0.996613	-1.58135	0.996565	-6.77607	0.00593746	2.0667	0.889771	-0.539789	0.999998	-0.545112	0.999998	-5.73983	0.299972	3.10295	0.887814	-0.00532333	1	-5.20004	0.607616	3.64273	0.878101	-5.19472	0.609585	3.64806	0.87771	8.84278	0.00290348
hlyB	0.875	0.0816327	0.0909091	0	0.04	0.290323	0.0984848	-2.61258	0.0142053	-0.213379	0.999999	-0.733756	0.997814	1.07281	0.995943	1.96964	0.287558	0.339949	0.997494	2.39921	0.759738	1.87883	0.896396	3.68539	0.459718	4.58222	0.000392225	2.95253	0.00577923	-0.520377	0.999961	1.28619	0.997161	2.18302	0.828525	0.553328	0.999833	1.80656	0.962229	2.70339	0.634436	1.07371	0.988056	0.896832	0.99929	-0.732857	0.999627	-1.62969	0.589795
tia	0.0625	0.0612245	0	0	0.32	0.645161	0.212121	1.64666	0.522872	0.497375	0.999747	2.29138	0.757804	2.65114	0.645901	-0.0529193	1	-1.1592	0.300591	-1.14929	0.992707	0.644713	0.999838	1.00447	0.998198	-1.69958	0.539347	-2.80586	0.0384758	1.794	0.973394	2.15376	0.944484	-0.550295	0.999733	-1.65657	0.92318	0.359759	0.999998	-2.3443	0.791964	-3.45057	0.33749	-2.70406	0.689782	-3.81033	0.249198	-1.10628	0.464142
chuS	1	1	0.909091	1	0.96	0.967742	0.613636	-0.317407	0.999999	-0.466509	0.999987	5.16687	0.18741	-0.009614	1	1.91827	0.808855	3.59598	0.245272	-0.149102	1	5.48428	0.489755	0.307793	1	2.23568	0.961795	3.91338	0.669993	5.63338	0.44738	0.456895	0.999999	2.38478	0.954979	4.06248	0.674775	-5.17649	0.672602	-3.2486	0.859639	-1.5709	0.995013	1.92789	0.993234	3.60559	0.874797	1.6777	0.949466
ybtA	1	0.979592	1	0.714286	1	1	0.681818	-0.0633413	1	5.31459	0.39595	-1.65751	0.935904	0.900627	0.969525	-0.0584152	1	-0.035696	1	5.37793	0.706719	-1.59417	0.997599	0.963968	0.999762	0.00492613	1	0.0276453	1	-6.9721	0.249594	-4.41396	0.730442	-5.373	0.701247	-5.35028	0.713285	2.55813	0.695218	1.59909	0.9975	1.62181	0.997385	-0.959042	0.999763	-0.936323	0.999801	0.0227191	1
etsC	0	0	0	0	0	0.16129	0.128788	1.00221	0.996095	9.93115	0.0363202	0.262536	1	0.165049	1	1.5144	0.953364	-2.25761	0.143248	8.92894	0.20999	-0.739672	0.99996	-0.837159	0.99993	0.512194	0.999985	-3.25982	0.463292	-9.66861	0.148055	-9.7661	0.157352	-8.41675	0.248377	-12.1888	0.0140813	-0.0974869	1	1.25187	0.999008	-2.52014	0.91932	1.34935	0.998737	-2.42266	0.944914	-3.77201	0.21571
ompT	1	0.959184	1	0.857143	1	0.967742	0.651515	-0.249315	1	-8.30164	0.0651258	-4.27	0.16292	-2.07588	0.331062	-0.52604	0.99995	1.90592	0.806794	-8.05233	0.292213	-4.02068	0.746383	-1.82656	0.984894	-0.276724	1	2.15523	0.972699	4.03165	0.881973	6.22576	0.386115	7.7756	0.286808	10.2076	0.0682514	2.19412	0.880885	3.74396	0.747267	6.17591	0.081661	1.54984	0.989217	3.98179	0.221723	2.43196	0.919857
cvaA	0	0	0	0	0.8	0.193548	0.227273	3.91567	0.188166	0.384208	0.999995	0.0468426	1	0.0453315	1	-1.8691	0.0288622	0.511368	0.983275	-3.53146	0.817167	-3.86883	0.8289	-3.87034	0.827843	-5.78477	0.00893631	-3.4043	0.380285	-0.337366	1	-0.338877	1	-2.25331	0.929073	0.12716	1	-0.00151104	1	-1.91594	0.986502	0.464526	0.999996	-1.91443	0.986452	0.466037	0.999996	2.38047	0.0133992
cvaC	0	0	0	0	0	0.193548	0.106061	0.241024	1	0.589001	0.999943	0.15667	1	0.140261	1	0.297117	0.999999	-4.94445	0.0202872	0.347976	1	-0.0843542	1	-0.100763	1	0.056093	1	-5.18547	0.318862	-0.43233	0.999999	-0.448739	0.999999	-0.291883	1	-5.53345	0.243557	-0.0164091	1	0.140447	1	-5.10112	0.45801	0.156856	1	-5.08471	0.469395	-5.24157	0.261458
kpsT	1	0.714286	0.181818	0.357143	0.64	1	0.469697	-1.90921	0.855771	0.389601	0.999901	2.18439	0.200563	1.7479	0.432898	1.47672	0.135473	-1.85331	0.872509	2.29881	0.898437	4.0936	0.224129	3.65711	0.346713	3.38593	0.275006	0.0559051	1	1.79479	0.887215	1.3583	0.971397	1.08712	0.98356	-2.24291	0.908509	-0.436493	0.999036	-0.707671	0.995215	-4.0377	0.222752	-0.271178	0.999978	-3.60121	0.341382	-3.33003	0.291847
rfc	0	0.0816327	0	0	0	0	0.00757576	0.957813	0.997739	-12.6665	0.00038338	0.0299285	1	0.0772066	1	0.826788	0.999062	1.43864	0.97774	-13.6243	0.00100041	-0.927884	0.99992	-0.880606	0.999933	-0.131025	1	0.480824	0.999991	12.6964	0.0131843	12.7437	0.00981273	13.4933	0.00087318	14.1052	0.000457498	0.0472781	1	0.79686	0.999968	1.40871	0.999045	0.749581	0.999974	1.36143	0.999088	0.611849	0.999966
traT	0.75	0.959184	0.454545	0.857143	0.56	0.870968	0.515152	-1.52195	0.331557	-0.179201	1	2.5856	0.135963	0.781026	0.994671	-0.391298	0.990558	-1.87371	0.0917243	1.34275	0.996992	4.10755	0.0240138	2.30298	0.664911	1.13065	0.702041	-0.351762	0.999459	2.7648	0.865048	0.960227	0.999644	-0.212097	1	-1.69451	0.989169	-1.80457	0.538221	-2.9769	0.15391	-4.45931	0.00342286	-1.17232	0.975636	-2.65474	0.406209	-1.48241	0.338773
afaA	0	0.122449	0	0	0	0	0.0606061	1.37182	0.97311	-1.22066	0.979727	3.3093	0.45886	4.48456	0.248139	1.79876	0.891484	2.78951	0.546713	-2.59248	0.885695	1.93748	0.981523	3.11274	0.880463	0.426939	0.999994	1.41769	0.994079	4.52996	0.399298	5.70523	0.239735	3.01942	0.760724	4.01017	0.504986	1.17526	0.998695	-1.51054	0.99466	-0.519793	0.999988	-2.68581	0.933714	-1.69506	0.993011	0.99075	0.999123
hylF	0	0	0	0	0	0.193548	0.166667	0.978899	0.996638	9.79785	0.0368677	0.250515	1	0.152108	1	1.46109	0.961424	-2.65128	0.0406033	8.81895	0.213042	-0.728384	0.999964	-0.826791	0.999937	0.482194	0.99999	-3.63017	0.326571	-9.54734	0.153563	-9.64574	0.163714	-8.33676	0.249128	-12.4491	0.00972671	-0.0984068	1	1.21058	0.999198	-2.90179	0.853562	1.30899	0.99897	-2.80338	0.895612	-4.11237	0.133171
ompTp	0	0	0	0	0	0.193548	0.113636	0.589507	0.999897	1.06162	0.99788	0.195824	1	0.17506	1	0.709013	0.999626	-3.57646	0.0244463	0.472114	0.999997	-0.393684	0.999999	-0.414447	0.999999	0.119505	1	-4.16597	0.317601	-0.865797	0.999937	-0.886561	0.999932	-0.352608	0.999999	-4.63808	0.347896	-0.0207633	1	0.513189	0.999996	-3.77228	0.695399	0.533952	0.999996	-3.75152	0.709256	-4.28547	0.237298
Dr.II	0	0.0612245	0	0	0	0	0.00757576	0.2344	1	-1.74773	0.961119	0.621969	0.999888	0.804082	0.999524	0.342983	0.999998	0.434587	0.999988	-1.98213	0.990897	0.387569	0.999999	0.569682	0.999994	0.108583	1	0.200187	1	2.3697	0.967643	2.55181	0.95583	2.09072	0.984851	2.18232	0.979917	0.182113	1	-0.278986	1	-0.187382	1	-0.461099	0.999998	-0.369495	0.999999	0.0916035	1
sfaE	0.8125	0	0.0909091	0	0.16	0.290323	0.128788	-1.34616	0.483886	0.152594	1	-1.97556	0.843045	0.438958	0.999988	1.1774	0.485106	0.710135	0.891838	1.49875	0.994873	-0.629401	0.999806	1.78511	0.977226	2.52356	0.0258848	2.05629	0.0796309	-2.12815	0.983301	0.286364	1	1.02481	0.999325	0.557541	0.999981	2.41452	0.936247	3.15296	0.48423	2.68569	0.600132	0.738444	0.999816	0.271177	0.999999	-0.467267	0.993663
aidA	0	0	0.0909091	0	0	0	0.174242	0.174301	1	-0.0679476	1	-1.73912	0.905066	0.492608	0.999973	0.171776	1	0.124399	1	-0.242248	1	-1.91342	0.990914	0.318307	1	-0.00252496	1	-0.0499012	1	-1.67117	0.997261	0.560555	0.999997	0.239723	1	0.192347	1	2.23172	0.950946	1.91089	0.990726	1.86352	0.992309	-0.320832	1	-0.368208	1	-0.0473762	1
kpsC	1	0.959184	0.909091	0.857143	1	1	0.515152	-1.69208	0.918075	0.14779	1	1.1194	0.970191	2.2129	0.477423	-1.84087	0.876943	-1.17195	0.988924	1.83987	0.975703	2.81148	0.772124	3.90497	0.374651	-0.148792	1	0.520123	0.999981	0.971608	0.998393	2.06511	0.919833	-1.98866	0.960809	-1.31974	0.996152	1.0935	0.984022	-2.96027	0.719418	-2.29135	0.902636	-4.05377	0.319249	-3.38485	0.557437	0.668915	0.999916
kpsD	1	0.979592	0.909091	0.857143	1	1	0.515152	-1.7025	0.91601	-0.119612	1	1.20559	0.959512	2.30128	0.442982	-1.83121	0.880007	-1.15521	0.989897	1.58289	0.990307	2.9081	0.747152	4.00378	0.348704	-0.128706	1	0.547289	0.999975	1.32521	0.992709	2.42089	0.86416	-1.7116	0.983941	-1.0356	0.999151	1.09568	0.984592	-3.0368	0.69925	-2.36081	0.891796	-4.13248	0.301427	-3.45649	0.537905	0.675995	0.999911
kpsE	1	0.979592	0.909091	0.857143	1	1	0.515152	-1.7025	0.91601	-0.119612	1	1.20559	0.959512	2.30128	0.442982	-1.83121	0.880007	-1.15521	0.989897	1.58289	0.990307	2.9081	0.747152	4.00378	0.348704	-0.128706	1	0.547289	0.999975	1.32521	0.992709	2.42089	0.86416	-1.7116	0.983941	-1.0356	0.999151	1.09568	0.984592	-3.0368	0.69925	-2.36081	0.891796	-4.13248	0.301427	-3.45649	0.537905	0.675995	0.999911
kpsU	1	0.979592	0.909091	0.857143	1	1	0.5	-1.84283	0.878794	-0.483524	0.999898	1.05537	0.976758	2.13545	0.510892	-1.9929	0.828107	-1.28086	0.981231	1.3593	0.995624	2.8982	0.739911	3.97827	0.342891	-0.150077	1	0.561968	0.999969	1.5389	0.98266	2.61897	0.8034	-1.50938	0.991513	-0.797336	0.999801	1.08007	0.984685	-3.04828	0.684723	-2.33623	0.888358	-4.12835	0.290498	-3.4163	0.530237	0.712044	0.999873
aslA	1	1	1	1	1	1	0.719697	-0.263843	1	0.0459445	1	0.0223147	1	0.0283952	1	-0.267623	1	0.00014652	1	0.309788	1	0.286158	1	0.292239	1	-0.00377949	1	0.26399	1	-0.0236298	1	-0.0175493	1	-0.313567	1	-0.045798	1	0.00608045	1	-0.289938	1	-0.0221682	1	-0.296018	1	-0.0282486	1	0.267769	1
chuA	1	1	1	1	1	1	0.628788	0.00378904	1	-0.00408369	1	0.0237047	1	0.0301697	1	0.0102892	1	0.0666428	1	-0.00787272	1	0.0199157	1	0.0263806	1	0.00650021	1	0.0628538	1	0.0277884	1	0.0342533	1	0.0143729	1	0.0707265	1	0.00646493	1	-0.0134155	1	0.0429381	1	-0.0198804	1	0.0364731	1	0.0563536	1
chuT	1	1	1	1	1	1	0.628788	0.00378904	1	-0.00408369	1	0.0237047	1	0.0301697	1	0.0102892	1	0.0666428	1	-0.00787272	1	0.0199157	1	0.0263806	1	0.00650021	1	0.0628538	1	0.0277884	1	0.0342533	1	0.0143729	1	0.0707265	1	0.00646493	1	-0.0134155	1	0.0429381	1	-0.0198804	1	0.0364731	1	0.0563536	1
chuU	1	1	1	1	1	1	0.628788	0.00378904	1	-0.00408369	1	0.0237047	1	0.0301697	1	0.0102892	1	0.0666428	1	-0.00787272	1	0.0199157	1	0.0263806	1	0.00650021	1	0.0628538	1	0.0277884	1	0.0342533	1	0.0143729	1	0.0707265	1	0.00646493	1	-0.0134155	1	0.0429381	1	-0.0198804	1	0.0364731	1	0.0563536	1
chuW	1	1	1	1	1	1	0.628788	0.00378904	1	-0.00408369	1	0.0237047	1	0.0301697	1	0.0102892	1	0.0666428	1	-0.00787272	1	0.0199157	1	0.0263806	1	0.00650021	1	0.0628538	1	0.0277884	1	0.0342533	1	0.0143729	1	0.0707265	1	0.00646493	1	-0.0134155	1	0.0429381	1	-0.0198804	1	0.0364731	1	0.0563536	1
chuX	1	1	1	1	1	1	0.651515	-0.157101	1	-0.391351	0.999996	0.0193003	1	0.0249005	1	-0.174953	1	0.0149203	1	-0.234249	1	0.176402	1	0.182002	1	-0.0178519	1	0.172022	1	0.410651	1	0.416251	1	0.216397	1	0.406271	1	0.00560021	1	-0.194254	1	-0.00438	1	-0.199854	1	-0.00998021	1	0.189874	1
iroC	0.8125	0	0	0	0.8	0.483871	0.287879	-0.481662	0.993449	1.15582	0.995111	-0.00238926	1	-0.0064914	1	-0.912345	0.709324	-0.16804	0.99994	1.63748	0.982367	0.479272	0.999997	0.47517	0.999997	-0.430683	0.99815	0.313621	0.999614	-1.15821	0.999767	-1.16231	0.999764	-2.06816	0.929357	-1.32386	0.993458	-0.00410214	1	-0.909955	0.999836	-0.165651	1	-0.905853	0.999841	-0.161549	1	0.744304	0.923907
iroD	0.8125	0	0	0	0.8	0.451613	0.30303	-0.522441	0.989592	2.35821	0.867962	-0.00226822	1	-0.00718543	1	-0.832959	0.784059	-0.0926459	0.999998	2.88065	0.807414	0.520173	0.999994	0.515256	0.999995	-0.310518	0.999704	0.429795	0.997638	-2.36048	0.988492	-2.3654	0.988446	-3.19117	0.668219	-2.45086	0.891183	-0.00491721	1	-0.83069	0.999904	-0.0903777	1	-0.825773	0.999908	-0.0854605	1	0.740313	0.923702
irp1	0.8125	0.918367	0.727273	0.714286	1	0.935484	0.590909	0.527208	0.992322	0.407336	0.99993	0.68297	0.986364	0.973977	0.930427	-2.10583	0.785174	-0.0209859	1	-0.119873	1	0.155761	1	0.446769	0.999779	-2.63304	0.634079	-0.548194	0.997039	0.275634	0.999997	0.566641	0.999851	-2.51316	0.86672	-0.428322	0.999971	0.291007	0.999898	-2.7888	0.668589	-0.703956	0.996679	-3.07981	0.562727	-0.994963	0.979378	2.08484	0.851338
irp2	0.9375	0.938776	1	0.714286	0.96	0.967742	0.651515	0.537327	0.998938	1.1608	0.986919	-1.59195	0.946218	1.22411	0.858037	0.306628	0.99995	0.5183	0.999131	0.623469	0.999889	-2.12928	0.92186	0.686781	0.999234	-0.230699	0.999998	-0.019027	1	-2.75274	0.855485	0.0633123	1	-0.854168	0.999138	-0.642496	0.999867	2.81606	0.590678	1.89858	0.951448	2.11025	0.921028	-0.91748	0.995634	-0.705808	0.998919	0.211672	0.999999
ybtE	1	1	1	0.714286	1	1	0.666667	-0.2757	0.999999	-0.286041	0.999999	-1.71775	0.922877	0.950979	0.955171	-0.316369	0.999999	-0.253065	1	-0.0103412	1	-1.44205	0.997749	1.22668	0.998193	-0.0406691	1	0.0226353	1	-1.43171	0.997926	1.23702	0.998282	-0.030328	1	0.0329764	1	2.66873	0.644756	1.40138	0.997911	1.46469	0.997533	-1.26735	0.997587	-1.20404	0.998348	0.0633044	1
ybtP	1	0.959184	1	0.714286	1	1	0.674242	-0.255725	1	3.46947	0.592718	-1.62995	0.940383	1.0523	0.932066	-0.288877	0.999999	-0.231088	1	3.7252	0.841795	-1.37423	0.998363	1.30802	0.997576	-0.033153	1	0.0246369	1	-5.09942	0.399704	-2.41717	0.939941	-3.75835	0.822991	-3.70056	0.846761	2.68225	0.645101	1.34108	0.998462	1.39887	0.998196	-1.34118	0.996944	-1.28339	0.997809	0.0577899	1
ybtQ	1	0.979592	1	0.714286	1	1	0.674242	-0.261848	1	3.20028	0.743328	-1.60662	0.944486	1.05491	0.931948	-0.286564	0.999999	-0.2354	1	3.46212	0.898942	-1.34478	0.998542	1.31676	0.997464	-0.0247166	1	0.0264482	1	-4.8069	0.525347	-2.14537	0.973388	-3.48684	0.888374	-3.43568	0.9029	2.66153	0.655394	1.32006	0.998603	1.37122	0.99838	-1.34147	0.996966	-1.29031	0.997727	0.0511647	1
ybtS	1	1	1	0.714286	1	1	0.674242	-0.146694	1	-0.0882386	1	-1.65821	0.935344	0.99188	0.949554	-0.162582	1	-0.118299	1	0.058455	1	-1.51151	0.997774	1.13857	0.999175	-0.0158881	1	0.0283947	1	-1.56997	0.997386	1.08012	0.999442	-0.0743431	1	-0.0300603	1	2.65009	0.657408	1.49563	0.997767	1.53991	0.997549	-1.15446	0.999038	-1.11018	0.99929	0.0442828	1
ybtT	1	1	1	0.714286	1	1	0.681818	0.016151	1	0.0787909	1	-1.77538	0.912421	0.739224	0.989927	0.0309275	1	0.0460749	1	0.0626399	1	-1.79153	0.996356	0.723073	0.999967	0.0147766	1	0.0299239	1	-1.85417	0.995574	0.660433	0.999981	-0.0478633	1	-0.032716	1	2.5146	0.709837	1.80631	0.996157	1.82146	0.996021	-0.708296	0.999971	-0.693149	0.999975	0.0151473	1
ybtU	1	1	1	0.714286	1	1	0.674242	-0.448051	0.999985	-0.0844507	1	-1.5952	0.946158	1.05252	0.931012	-0.479884	0.999975	-0.429388	0.999988	0.3636	1	-1.14715	0.999208	1.50057	0.992461	-0.0318327	1	0.018663	1	-1.51075	0.997903	1.13697	0.999246	-0.395433	0.999999	-0.344937	1	2.64772	0.661779	1.11532	0.999286	1.16581	0.999118	-1.5324	0.990987	-1.4819	0.992707	0.0504957	1
ybtX	1	1	1	0.714286	1	1	0.674242	-0.146694	1	-0.0882386	1	-1.65821	0.935344	0.99188	0.949554	-0.162582	1	-0.118299	1	0.058455	1	-1.51151	0.997774	1.13857	0.999175	-0.0158881	1	0.0283947	1	-1.56997	0.997386	1.08012	0.999442	-0.0743431	1	-0.0300603	1	2.65009	0.657408	1.49563	0.997767	1.53991	0.997549	-1.15446	0.999038	-1.11018	0.99929	0.0442828	1
fuyA	1	1	1	0.714286	1	1	0.681818	0.016151	1	0.0787909	1	-1.77538	0.912421	0.739224	0.989927	0.0309275	1	0.0460749	1	0.0626399	1	-1.79153	0.996356	0.723073	0.999967	0.0147766	1	0.0299239	1	-1.85417	0.995574	0.660433	0.999981	-0.0478633	1	-0.032716	1	2.5146	0.709837	1.80631	0.996157	1.82146	0.996021	-0.708296	0.999971	-0.693149	0.999975	0.0151473	1
ecpA	1	1	1	1	1	1	0.939394	-0.347252	0.999997	-0.64609	0.999898	-0.188489	1	-0.178145	1	-0.428038	0.999989	-0.326717	0.999998	-0.298839	1	0.158763	1	0.169107	1	-0.0807862	1	0.0205343	1	0.457602	0.999999	0.467946	0.999999	0.218052	1	0.319373	1	0.0103442	1	-0.239549	1	-0.138229	1	-0.249893	1	-0.148573	1	0.101321	1
ecpB	1	1	1	1	1	1	0.939394	-0.347252	0.999997	-0.64609	0.999898	-0.188489	1	-0.178145	1	-0.428038	0.999989	-0.326717	0.999998	-0.298839	1	0.158763	1	0.169107	1	-0.0807862	1	0.0205343	1	0.457602	0.999999	0.467946	0.999999	0.218052	1	0.319373	1	0.0103442	1	-0.239549	1	-0.138229	1	-0.249893	1	-0.148573	1	0.101321	1
ecpC	1	1	1	1	1	1	0.939394	-0.347252	0.999997	-0.64609	0.999898	-0.188489	1	-0.178145	1	-0.428038	0.999989	-0.326717	0.999998	-0.298839	1	0.158763	1	0.169107	1	-0.0807862	1	0.0205343	1	0.457602	0.999999	0.467946	0.999999	0.218052	1	0.319373	1	0.0103442	1	-0.239549	1	-0.138229	1	-0.249893	1	-0.148573	1	0.101321	1
ecpE	1	1	1	1	1	1	0.939394	-0.347252	0.999997	-0.64609	0.999898	-0.188489	1	-0.178145	1	-0.428038	0.999989	-0.326717	0.999998	-0.298839	1	0.158763	1	0.169107	1	-0.0807862	1	0.0205343	1	0.457602	0.999999	0.467946	0.999999	0.218052	1	0.319373	1	0.0103442	1	-0.239549	1	-0.138229	1	-0.249893	1	-0.148573	1	0.101321	1
ecpR	1	1	1	1	1	1	0.931818	-0.341038	0.999998	-0.746493	0.999755	-0.191746	1	-0.178303	1	-0.423524	0.99999	-0.31375	0.999999	-0.405455	0.999999	0.149292	1	0.162734	1	-0.0824859	1	0.0272879	1	0.554747	0.999996	0.56819	0.999995	0.322969	1	0.432743	0.999999	0.0134423	1	-0.231778	1	-0.122004	1	-0.24522	1	-0.135446	1	0.109774	1
fimA	1	0.979592	0.909091	1	1	1	0.863636	-1.55142	0.947586	-0.932035	0.996624	0.723834	0.997393	-0.901598	0.99841	-1.8396	0.878941	-1.79517	0.893968	0.619389	0.999959	2.27526	0.911801	0.649826	0.999957	-0.288178	0.999999	-0.243743	1	1.65587	0.979289	0.0304371	1	-0.907567	0.999564	-0.863132	0.999708	-1.62543	0.979642	-2.56344	0.846292	-2.519	0.848821	-0.938004	0.999612	-0.893569	0.999696	0.0444351	1
fimE	1	1	1	1	1	1	0.878788	-1.60856	0.937655	-1.79297	0.964675	-0.671392	0.999773	-0.695024	0.999731	-1.87105	0.8702	-1.83525	0.884086	-0.184406	1	0.937172	0.999682	0.91354	0.99973	-0.262483	1	-0.226685	1	1.12158	0.999485	1.09795	0.999567	-0.0780768	1	-0.042279	1	-0.0236319	1	-1.19965	0.998632	-1.16386	0.998812	-1.17602	0.998799	-1.14023	0.99895	0.0357978	1
fimF	1	1	1	1	1	1	0.909091	-0.888919	0.998256	-1.73454	0.973361	-0.456302	0.999985	-0.449125	0.999987	-1.08451	0.993592	-0.969104	0.996927	-0.845619	0.999898	0.432617	0.999998	0.439794	0.999998	-0.195591	1	-0.080185	1	1.27824	0.999164	1.28541	0.999182	0.650028	0.999975	0.765434	0.999941	0.00717677	1	-0.628208	0.999979	-0.512802	0.999994	-0.635385	0.999978	-0.519979	0.999993	0.115406	1
fimG	1	1	1	1	1	1	0.909091	-0.888919	0.998256	-1.73454	0.973361	-0.456302	0.999985	-0.449125	0.999987	-1.08451	0.993592	-0.969104	0.996927	-0.845619	0.999898	0.432617	0.999998	0.439794	0.999998	-0.195591	1	-0.080185	1	1.27824	0.999164	1.28541	0.999182	0.650028	0.999975	0.765434	0.999941	0.00717677	1	-0.628208	0.999979	-0.512802	0.999994	-0.635385	0.999978	-0.519979	0.999993	0.115406	1
fimH	1	1	1	1	1	1	0.909091	-0.888919	0.998256	-1.73454	0.973361	-0.456302	0.999985	-0.449125	0.999987	-1.08451	0.993592	-0.969104	0.996927	-0.845619	0.999898	0.432617	0.999998	0.439794	0.999998	-0.195591	1	-0.080185	1	1.27824	0.999164	1.28541	0.999182	0.650028	0.999975	0.765434	0.999941	0.00717677	1	-0.628208	0.999979	-0.512802	0.999994	-0.635385	0.999978	-0.519979	0.999993	0.115406	1
fimI	1	1	1	1	1	1	0.871212	-1.61088	0.937119	-1.84557	0.959589	-0.669482	0.999777	-0.687832	0.999747	-1.87387	0.8692	-1.81945	0.888147	-0.234696	1	0.941393	0.999673	0.923043	0.999713	-0.262996	1	-0.208575	1	1.17609	0.999326	1.15774	0.999415	-0.0282995	1	0.0261211	1	-0.0183504	1	-1.20439	0.998599	-1.14997	0.998889	-1.18604	0.99874	-1.13162	0.998996	0.0544206	1
[truncated: 42 more columns]
